1 **Understanding the factors that shape patterns of**  
2 **nucleotide diversity in the house mouse genome**

3 Tom R. Booker and Peter D. Keightley

4 *Institute of Evolutionary Biology, University of Edinburgh, Edinburgh EH9 3FL, United Kingdom*

5 Correspondence: *t.r.booker@ed.ac.uk*

6

7

8

9

10

11

12

13

14

15

16

17

## 18 **Abstract**

19           A major goal of population genetics has been to determine the extent to which selection  
20 at linked sites influences patterns of neutral nucleotide diversity in the genome. Multiple lines of  
21 evidence suggest that diversity is influenced by both positive and negative selection. For  
22 example, in many species there are troughs in diversity surrounding functional genomic  
23 elements, consistent with the action of either background selection (BGS) or selective sweeps.  
24 In this study, we investigated the causes of the diversity troughs that are observed in the wild  
25 house mouse genome. Using the unfolded site frequency spectrum (uSFS), we estimated the  
26 strength and frequencies of deleterious and advantageous mutations occurring in different  
27 functional elements in the genome. We then used these estimates to parameterize forward-in-  
28 time simulations of chromosomes, using realistic distributions of functional elements and  
29 recombination rate variation in order to determine if selection at linked sites can explain the  
30 observed patterns of nucleotide diversity. The simulations suggest that BGS alone cannot  
31 explain the dips in diversity around either exons or conserved non-coding elements (CNEs). A  
32 combination of BGS and selective sweeps, however, can explain the troughs in diversity around  
33 CNEs. This is not the case for protein-coding exons, where observed dips in diversity cannot be  
34 explained by parameter estimates obtained from the uSFS. We discuss the extent to which our  
35 results provide evidence of sweeps playing a role in shaping patterns of nucleotide diversity and  
36 the limitations of using the uSFS for obtaining inferences of the frequency and effects of  
37 advantageous mutations.

38

39

40

## 41 **Author Summary**

42           We present a study examining the causes of variation in nucleotide diversity  
43 across the mouse genome. The status of mice as a model organism in the life sciences  
44 makes them an excellent model system for studying molecular evolution in mammals. In  
45 our study, we analyse how natural selection acting on new mutations can affect levels of  
46 nucleotide diversity through the processes of background selection and selective  
47 sweeps. To perform our analyses, we first estimated the rate and strengths of selected  
48 mutations from a sample of wild mice and then use our estimates in realistic population  
49 genetic simulations. Analysing simulations, we find that both harmful and beneficial  
50 mutations are required to explain patterns of nucleotide diversity in regions of the  
51 genome close to gene regulatory elements. For protein-coding genes, however, our  
52 approach is not able to fully explain observed patterns and we think that this is because  
53 there are strongly advantageous mutations that occur in protein-coding genes that we  
54 were not able to detect.

55

56

57

58

59

60

## 61 Introduction

62

63 Starting with the discovery of a positive correlation between nucleotide polymorphism  
64 and the recombination rate in *Drosophila* in the late 1980s and early 1990s [1, 2], it has become  
65 clear that natural selection affects levels of genetic diversity across the genomes of many  
66 species [3, 4]. More recently, models incorporating selection at sites linked to those under  
67 observation have been shown to explain a large amount of the variation in diversity across the  
68 genome [5-8]. However, a persistent challenge has been to tease apart the contributions of  
69 positive and negative selection to the observed patterns.

70 Because the fates of linked alleles are non-independent, selection acting at one site may  
71 have consequences for variation and evolution at another. In broad terms, there are two models  
72 describing the effects of directional selection on neutral genetic diversity at linked sites,  
73 selective sweeps (SSWs) and background selection (BGS). SSWs occur when positively  
74 selected alleles spread through a population, dragging with them the haplotype on which they  
75 arose [9, 10]. There are a number of different types of SSW (reviewed in [11]), but in the present  
76 study, when not made explicit, we use the term selective sweep to refer to the effects of a single  
77 *de novo* advantageous mutation being driven to fixation by selection. BGS, on the other hand,  
78 occurs because the removal of deleterious mutations results in a loss of genetic diversity at  
79 linked neutral sites [12, 13]. The magnitudes of the effects of SSWs and BGS depend on the  
80 strength of selection, the rate of recombination and the mutation rate [10, 14, 15]. SSWs and  
81 BGS have qualitatively similar effects on genetic diversity, however, and many polymorphism  
82 summary statistics have little power to distinguish between them [12, 16].

83

84 Several studies have attempted to differentiate between BGS and SSWs. For example,  
85 Sattath *et al.* [17] examined patterns of nucleotide diversity around recent nucleotide

86 substitutions in *Drosophila simulans*. Averaging across the entire genome, they observed a  
87 trough in diversity around nonsynonymous substitutions, whereas diversity was relatively  
88 constant around synonymous ones. This difference is expected under a model of recurrent  
89 SSWs, but not under BGS. Their results provide evidence that SSWs have been frequent in *D.*  
90 *simulans* since the species shared a common ancestor with *Drosophila melanogaster* (the  
91 outgroup used in that study). Similar results have been reported for *Capsella grandiflora* [18]. In  
92 humans [19], house mice [20] and maize [21], however, there is very little difference between  
93 the patterns of diversity around putatively neutral and potentially adaptive substitutions. These  
94 results have been interpreted as evidence that hard SSWs are infrequent in those species.  
95 However, Enard *et al.* [22] argued that since most adaptive substitutions are expected to occur  
96 in regions with the lowest functional constraint (and thus weaker BGS effects), the results of the  
97 Sattath test may be difficult to interpret in species with genomes that exhibit highly variable  
98 levels of functional constraint, such as humans and mice (but see [21]). Indeed, Enard *et al.* [22]  
99 found evidence that adaptive substitutions are fairly frequent in both protein-coding and non-  
100 coding portions of the human genome, suggesting that SSWs are common.

101  
102         There are a number of methods that estimate the frequency and strength of  
103 advantageous mutations from models of the effects of selection at linked sites [11]. Recently,  
104 Elyashiv *et al.* [5] produced a map of the expected nucleotide diversity in *D. melanogaster* by  
105 fitting a model incorporating both BGS and hard SSWs to the genome-wide patterns of genetic  
106 diversity and the divergence between *D. melanogaster* and *D. simulans*. They concluded that  
107 sweeps are required to explain much of the genome-wide variation in diversity. However, the  
108 estimate of the deleterious per site mutation rate they obtained far exceeded published values  
109 of the point mutation rate in *D. melanogaster*. They, reasonably, attributed this discrepancy to  
110 the effects of selection at linked sites in addition to those they had explicitly modelled. The  
111 selection parameters estimated by Elyashiv *et al.* [5] were inferred from nucleotide diversity

112 only. There is information in the distribution of allele frequencies, the site frequency spectrum  
113 (SFS), however, that can be used to estimate the distribution of fitness effects (DFE) for both  
114 deleterious and advantageous mutations [23-26]. In the present study, we estimate the DFE  
115 using such methods, and then use our estimates to parameterise the effects of BGS and SSWs.

116

117 In this study, we attempt to understand the influence of natural selection on variation at  
118 linked sites in the house mouse, *Mus musculus*. Specifically, we analyse *M. m. castaneus*, a  
119 sub-species which has been estimated to have a long-term effective population size ( $N_e$ ) of  
120 around 500,000 [27, 28], making it a powerful system in which to study molecular evolution in  
121 mammals. Both protein-coding genes and phylogenetically conserved non-coding elements  
122 (CNEs, which have roles in the regulation of gene expression [29]) exhibit signatures of natural  
123 selection in *M. m. castaneus* [20]. In particular, Halligan *et al.* [20] showed that there are  
124 substantial reductions in diversity surrounding protein-coding exons and CNEs, consistent with  
125 selection reducing diversity at linked sites. The trough in diversity surrounding exons was found  
126 to be ~10x wider than the trough surrounding CNEs, suggesting that selection is typically  
127 stronger on protein sequences than regulatory sequences. However, Halligan *et al.* [20] found  
128 that troughs in diversity around recent nonsynonymous and synonymous substitutions in *M. m.*  
129 *castaneus* were similar. Taken at face value, this could be taken as evidence that SSWs are  
130 infrequent, but, in addition, Halligan *et al.* [20] found that there are also troughs in diversity  
131 around randomly chosen synonymous or nonsynonymous sites that are similar to those  
132 observed around substitutions. These results, therefore, suggest that selection at linked sites  
133 affects nucleotide diversity across large portions of the genome, making the analysis of patterns  
134 of diversity around substitutions difficult to interpret. Our understanding of the forces that have  
135 shaped patterns of diversity in the house mouse and mammals in general is, thus, somewhat  
136 unclear.

137

138 We analyse data on wild-caught *M. m. castaneus* individuals to obtain estimates of the  
139 distribution of fitness effects (DFEs) for several classes of functional elements in the mouse  
140 genome and then use these to parameterise forward-in-time simulations. We analyse several  
141 aspects of our simulation data: 1) the patterns of genetic diversity and the distribution of allele  
142 frequencies around both protein-coding exons and conserved non-coding elements; 2) the rates  
143 of substitution in different functional elements; and 3) the patterns of diversity around  
144 nonsynonymous and synonymous substitutions.

145

## 146 **Materials and Methods**

### 147 **Samples and polymorphism data**

148

149 We analysed the genome sequences of 10 wild-caught *M. m. castaneus* individuals  
150 sequenced by Halligan *et al.* [20]. The individuals were sampled from an area that is thought to  
151 include the ancestral range of the species [28]. A population structure analysis suggested that  
152 the individuals chosen for sequencing came from a single randomly mating population [27].  
153 Sampled individuals were sequenced to an average depth of ~30x using Illumina technology.  
154 Reads were mapped to version mm9 of the mouse genome and variants called as described in  
155 Halligan *et al.* [20]. Only single nucleotide polymorphisms were considered, and  
156 insertion/deletion polymorphisms were excluded from downstream analyses. We used the  
157 genome sequences of *Mus famulus* and *Rattus norvegicus* as outgroups in this study. For *M.*  
158 *famulus*, a single individual was sequenced to high coverage and mapped to the mm9 genome  
159 [20]. For *R. norvegicus*, we used the whole genome alignment of the mouse (mm9) and rat (rn4)  
160 reference genomes from UCSC.

161

162 For the DFE-alpha analysis (*see below*), the underlying model assumes a single,  
163 constant mutation rate. Hypermutable CpG sites strongly violate this assumption, so CpG-prone  
164 sites were excluded as a conservative way to remove CpG sites from our analyses. A site was  
165 labelled as CpG-prone if it is preceded by a C or followed by a G in the 5' to 3' direction in either  
166 *M. m. castaneus*, *M. famulus* or *R. norvegicus*. Additionally, sites that failed a Hardy-Weinberg  
167 equilibrium test ( $p < 0.002$ ) were excluded from further analysis, because they may represent  
168 sequencing errors.

169

### 170 **Functional elements in the murid genome**

171

172 In this study, we considered three different classes of functional elements in the  
173 genome: the exons and untranslated regions (UTRs) of protein-coding genes and conserved  
174 non-coding elements (CNEs).

175

176 Coordinates for canonical splice-forms of protein-coding gene orthologs between *Mus*  
177 *musculus* and *Rattus norvegicus* were obtained from version 67 of the Ensembl database. We  
178 used these to identify untranslated regions (UTRs) as well as 4-fold and 0-fold degenerate sites  
179 in the coding regions. We made no distinction between 3' and 5' UTRs in the analysis. Genes  
180 containing alignment gaps affecting >80% of sites in either outgroup and genes containing  
181 overlapping reading frames were excluded. This left a total of 18,171 autosomal protein-coding  
182 genes.

183

184 The locations of conserved non-coding elements (CNEs) in the house mouse genome  
185 were identified as described by Halligan *et al.* [20].

186



187 Estimating the parameters of the distribution of fitness effects (DFE) for a particular class  
188 of sites using DFE-alpha (see *below*) requires neutrally evolving sequences for comparison.  
189 When analysing 0-fold degenerate sites and UTRs, we used 4-fold degenerate sites as the  
190 comparator. For CNEs, we used non-conserved sequence in the flanks of CNEs. Halligan *et al.*  
191 [20] found that, compared to the genome-wide average, nucleotide divergence between mouse  
192 and rat in the ~500bp on either side of CNEs is ~20% lower than that of intergenic DNA distant  
193 from CNEs, suggesting functional constraint in these regions. For the purpose of obtaining a  
194 quasi-neutrally evolving reference class of sequence and to avoid these potentially functional  
195 sequences, we therefore used sequence flanking the edges of each CNE, offset by 500bps. For  
196 each CNE, the total amount of flanking sequence used in the analysis was equal to the length of  
197 the focal CNE, split evenly between the upstream and downstream regions. CNE-flanking  
198 sequences overlapping with another annotated feature (i.e. exon, UTR or CNE) or the flanking  
199 sequence of another CNE were excluded.

200

### 201 **The site frequency spectrum around functional elements**

202

203 For distances of up to 100Kbp on either side of exons and 5Kbp on either side of CNEs,  
204 the non-CpG-prone sites in non-overlapping windows of 1Kbp and 100bp, respectively, were  
205 extracted. Sites within analysis windows that overlapped with any of the annotated features  
206 described above, or that contained missing data in *M. m. castaneus* or either outgroup were  
207 excluded. The data for analysis windows were collated based on the distance to the nearest  
208 CNE or exon, from which we calculated nucleotide diversity and Tajima's *D*.

209

### 210 **Overview of DFE-alpha analysis**

211

212           The distribution of allele frequencies in a sample, referred to as the site frequency  
213 spectrum (SFS), provides information on evolutionary processes. Under neutrality the SFS  
214 reflects past demographic processes, such as population expansions and bottlenecks, and  
215 potentially the effects of selection at linked sites. The allele frequency distribution will also be  
216 distorted if focal sites are subject to functional constraints. The SFS therefore contains  
217 information on the strengths and frequencies of mutations with different selective effects, known  
218 as the distribution of fitness effects (hereafter the DFE). Note that balancing selection may  
219 maintain alleles at intermediate frequencies [30], but we assume that the contribution of this  
220 form of selection to overall genomic diversity is negligible.

221  
222           DFE-alpha estimates selection parameters using information contained in the SFS by a  
223 two-step procedure [24]. First, a demographic model is fitted to data for a class of putatively  
224 neutral sites. Conditional on the demographic parameter estimates, the DFE is then estimated  
225 for the selected sites. In the absence of knowledge of ancestral or derived alleles, the ‘folded’  
226 SFS can be used to estimate the demographic model and the DFE for harmful variants  
227 (hereafter referred to as the dDFE) [24]. If information from one or more outgroup species is  
228 available, and the ancestral state for a segregating site can be inferred, one can construct the  
229 ‘unfolded’ SFS (uSFS). In the presence of positive selection, such that advantageous alleles  
230 segregate at an appreciable frequency, the parameters of the distribution of fitness effects for  
231 advantageous mutations can be estimated from the uSFS [25, 26, 31]. In this study, we  
232 estimate the proportion of new mutations occurring at a site that are advantageous ( $p_a$ ) and the  
233 strength of selection acting on them ( $N_e s_a$ ).

234

### 235 **Inference of the uSFS and the DFE**

236

237           We inferred the distributions of derived allele frequencies in our sample for 0-fold and 4-  
238 fold sites, UTRs, CNEs and CNE-flanks using *M. famulus* and *R. norvegicus* as outgroups,  
239 using the two-outgroup method implemented in ml-est-sfs v1.1 [31]. This method employs a  
240 two-step procedure conceived to address the biases inherent in parsimony methods. The first  
241 step estimates the rate parameters for the tree under the Jukes-Cantor model by maximum  
242 likelihood assuming a single mutation rate. Conditional on the rate parameters, the individual  
243 elements of the uSFS are then estimated.

244

245           DFE-alpha fits discrete population size models, allowing up to two changes in population  
246 size through time. For each class of putatively neutral sites, one-, two- and three-epoch models  
247 were fitted by maximum likelihood and the models with the best fit (as judged by likelihood ratio  
248 tests) were used in further analyses. When fitting the three-epoch model, we ran DFE-alpha  
249 (v2.16) 10 times with a range of different search algorithm starting values, in order to check  
250 convergence.

251

252           In the cases of 4-fold sites and CNE-flanks, the inferred uSFSs exhibited a higher  
253 proportion of high frequency derived alleles than expected under the best-fitting demographic  
254 model (Figure S1) (hereafter referred to as an uptick). Such an increase is not possible under  
255 the single population, single locus demographic models assumed. There are several possible  
256 explanations for the uptick: 1) mis-inference of the uSFS due to an inadequacy of the model  
257 assumed in ml-est-sfs; 2) failure to capture the demographic history of *M. m. castaneus* by the  
258 models implemented in DFE-alpha; 3) sequencing errors in *M. m. castaneus* or either outgroup  
259 generating spurious signals of divergence; 4) SSWs, since they can drag linked alleles to high  
260 frequencies [32, 33]; 5) cryptic population sub-division in our sample of mouse individuals; and  
261 6) positive selection, acting on the putatively neutral sites themselves. We think this latter  
262 explanation is unlikely, however, since there is little evidence for selection on synonymous

263 codon usage in *Mus musculus* [34]. With the exception of direct selection affecting the putatively  
264 neutral class of sites, the above sources of bias should also affect the selected class of sites  
265 [31, 35, 36]. We therefore corrected the selected sites uSFS prior to inferring selection  
266 parameters by subtracting the proportional deviation between the neutral uSFS expected under  
267 the best-fitting demographic model and the observed neutral uSFS (following Keightley *et al.*  
268 [31]; see Supplementary Methods).

269

270 Simultaneous inference of the DFE for harmful mutations (dDFE) and adaptive mutation  
271 parameters was performed using DFE-alpha (v.2.16) [25]. A gamma distribution has previously  
272 been used to model the dDFE, since it can take a variety of shapes and has only two  
273 parameters [37]. However, more parameter-rich discrete point mass distributions provide a  
274 better fit to nonsynonymous polymorphism site data in wild house mice [38]. We therefore  
275 compared the fit of one, two and three discrete class dDFEs and the gamma distribution, and  
276 also included one or more classes of advantageous mutations. Nested DFE models were  
277 compared using likelihood ratio tests, and non-nested models were compared using Akaike's  
278 Information Criteria (AIC). Goodness of fit was also assessed by comparing observed and  
279 expected uSFSs using the  $\chi^2$ -statistic, but the numbers of sites in the  $i^{\text{th}}$  and  $n-i^{\text{th}}$  classes are  
280 non-independent, so formal hypothesis tests were not performed.

281

282 We constructed profile likelihoods to obtain confidence intervals. Two unit reductions in  
283  $\log L$ , on either side of the maximum likelihood estimates (MLEs) were taken as approximate  
284 95% confidence limits.

285

286 **Two methods for inferring the rates and effects of advantageous mutations based on the**  
287 **uSFS**

288

289           It has been suggested that estimates of the DFE obtained based on the uSFS may be  
290   biased if sites fixed for the derived allele are included in calculations [26]. Sites fixed for the  
291   derived allele are typically a frequent class in the uSFS, and therefore strongly influence  
292   parameter estimates. Bias can arise, for example, if the selection strength has changed since  
293   the split with the outgroup, such that the number of sites fixed for the derived allele do not reflect  
294   the selection regime that generated current levels of polymorphism. If nucleotide divergence  
295   and polymorphism are decoupled in this way, selection parameter estimated from only  
296   polymorphism data (and sites fixed for ancestral alleles) may therefore be less biased than  
297   those obtained when using the full uSFS. To investigate this possibility, we estimated selection  
298   parameters either utilising the full uSFS (we refer to this method as Model A) or by analysing the  
299   uSFS while fitting an additional parameter (Supplementary Methods), such that sites fixed for  
300   the derived allele do not contribute to estimates of the selection parameters (we refer to this  
301   method as Model B).

302

303           Certain alleles present in a sample of individuals drawn from a population may appear to  
304   be fixed that are, in fact, polymorphic. Attributing such polymorphisms to between-species  
305   divergence may then influence estimates of the DFE by increasing the number of sites fixed for  
306   the derived allele (note that this would only affect estimates obtained under Model A). We  
307   corrected the effect of polymorphism attributed to divergence using an iterative approach as  
308   follows. When fitting selection or demographic models, DFE-alpha produces a vector of  
309   expected allele frequencies. Using this vector, we inferred the expected proportion of  
310   polymorphic sites that appear to be fixed for the derived allele. This proportion was then  
311   subtracted from the fixed derived class and distributed among the polymorphism bins according  
312   to the allele frequency vector. We then refitted the model using this corrected uSFS, and this  
313   procedure was applied iteratively until convergence (See Supplementary Methods). For each

314 site class, convergence was achieved within five iterations and the selection parameters for  
315 each class did not substantially change between iterations.

316

317 **Forward-in-time simulations modelling background selection and selective sweeps**

318

319 We performed forward-in-time simulations in SLiM v1.8 [39] to assess whether the  
320 observed patterns of diversity around functional elements [20] can be explained by SSWs or  
321 BGS caused by mutations originating in the elements themselves. These simulations focussed  
322 on either protein-coding exons or CNEs. We also ran SLiM simulations to model the  
323 accumulation of between-species divergence under our estimates of the DFE. In all our  
324 simulations, we either assumed the estimates of selection parameters obtained from the full  
325 uSFS (Model A) or those obtained when sites fixed for the derived allele do not contribute to  
326 parameter estimates (Model B).

327

328 Models of BGS and recurrent SSWs predict that the magnitudes of their effects are  
329 sensitive to the rate of recombination and mutation rate and the strength of selection [14, 40,  
330 41]. To parameterise our simulations, we used estimates of compound parameters scaled by  
331  $N_e$ . For example, estimates of selection parameters obtained from DFE-alpha are expressed in  
332 terms of  $N_e s$  (where  $s$  is the difference in fitness between homozygotes for ancestral and  
333 derived alleles, assuming semi-dominance). For a population where  $N_e = 1,000$  and  $s = 0.05$ , for  
334 example, the strength of selection is therefore approximately equivalent to that of a population  
335 where  $N_e = 10,000$  and  $s = 0.005$ . By scaling parameter values according to the population size  
336 of the simulations ( $N_{sim}$ ), we modelled the much larger *M. m. castaneus* population ( $N_e \cong$   
337 500,000 [42] in a computationally tractable way.

338

339 **1. Annotating simulated chromosomes**

340

341 Functional elements are non-randomly distributed across the house mouse genome. For  
342 example, protein-coding exons are clustered into genes and CNEs are often found close to  
343 other CNEs [20]. Incorporating this distribution into simulations is important when modelling  
344 BGS and recurrent SSWs, because their effects on neutral diversity depend on the density of  
345 functional sequence [14, 43]. We incorporated the distribution as follows. For each simulation  
346 replicate, we chose a random position on an autosome, which was itself randomly selected (with  
347 respect to length). The coordinates of the functional elements (exons, UTRs and CNEs) in the  
348 500Kbp downstream of that position were used to annotate a simulated chromosome of the  
349 same length. For simulations focussing on exons (CNEs), we only used chromosomal regions  
350 that had at least one exon (CNE).

351

352 **2. Mutation, recombination and selection in simulations**

353

354 We used an estimate of the population scaled mutation rate,  $\theta=4N_e\mu$ , to set the mutation  
355 rate ( $\mu$ ) in simulations, such that levels of neutral polymorphism approximately matched those of  
356 *M. m. castaneus*. Diversity at putatively neutral sites located close to functional elements (for  
357 example, 4-fold synonymous sites) may be affected by BGS and SSWs. To correct for this, we  
358 used an estimate of  $\theta = 0.0083$ , based on the average nucleotide diversity at non-CpG-prone  
359 sites at distances >75Kbp from protein-coding exons. This distance was used, because it the  
360 approximate distance beyond which nucleotide diversity remains flat. The mutation rate in  
361 simulations was thus set to  $0.0083/4N_{sim}$ .

362

363 Variations in the effectiveness of selection at linked sites, due to variation in the rate of  
364 recombination across the genome, may not be captured by simulations that assume a single

365 rate of crossing over. Recently, we generated a map of variation in the rate of crossing-over for  
366 *M. m. castaneus* using a coalescent approach [44], quantified in terms of the population scaled  
367 recombination rate  $\rho=4N_e r$ . Recombination rate variation in the 500Kbp region used to obtain  
368 functional annotation was used to specify the genetic map for individual simulations.

369

370 We modelled natural selection at sites within protein-coding exons, UTRs and CNEs in  
371 the simulations using the estimates of selection parameters obtained from the DFE-alpha  
372 analysis. In the case of protein-coding exons, 25% of sites were set to evolve neutrally (i.e.  
373 synonymous sites), and the fitness effects of the remaining 75% were drawn from the DFE  
374 inferred for 0-fold sites (hereafter termed nonsynonymous sites in the simulations). For  
375 mutations in UTRs and CNEs, 100% were drawn from the DFEs inferred for those elements.  
376 Population scaled selection coefficients were divided by  $N_{sim}$  to obtain values of  $s$  for use in  
377 simulations. All selected mutations were assigned a dominance coefficient of 0.5, as assumed  
378 by DFE-alpha.

379

### 380 **3. Patterns of diversity around functional elements in simulations**

381

382 We examined the contributions of BGS and recurrent SSWs to the troughs in diversity  
383 observed around protein-coding exons and CNEs using forward-in-time simulations. Focussing  
384 on either protein-coding exons or CNEs, we performed three sets of simulations. The first  
385 incorporated only harmful mutations (causing BGS), the second only advantageous mutations  
386 (causing SSWs), and the third set incorporated both (causing both processes). Thus, under a  
387 given set of DFE estimates, we performed six sets of simulations (three sets focussing on exons  
388 and three sets focussing on CNEs). For each simulation set, 2,000 SLiM runs were performed,  
389 each using a randomly sampled 500Kbp region of the genome. In each SLiM run, populations of  
390  $N_{sim}=1,000$  diploid individuals were allowed to evolve for 10,000 generations ( $10N_{sim}$ ) in order to



391 approach mutation-selection-drift balance. At this point, 200 randomly chosen haploid  
392 chromosomes were sampled from the population and used to construct SFSs.

393

394 For each set of simulations, segregating sites in windows surrounding functional  
395 elements were analysed in the same way as for the *M. m. castaneus* data (see above). The  
396 SFSs for all windows at the same distance from an element were collated. Analysis windows  
397 around protein-coding exons were oriented with respect to the strand orientation of the actual  
398 gene. Neutral sites near the tips of simulated chromosomes only experience selection at linked  
399 sites from one direction, so analysis windows located within 60Kbp of either end of a simulated  
400 chromosome were discarded. For a given distance to a functional element, we obtained  
401 confidence intervals around individual statistics by bootstrapping analysis window 1,000 times.

402

403 Mutation rate variation is expected to contribute to variation in nucleotide diversity.  
404 Nucleotide divergence between mouse and rat is relatively constant in the intergenic regions  
405 surrounding protein-coding exons [20], suggesting that mutation rate variation is not responsible  
406 for the troughs in diversity around exons. Around CNEs, however, there is a pronounced dip in  
407 nucleotide divergence between *M. m. castaneus* and the rat. A likely explanation for this is that  
408 alignment-based approaches to identify CNEs fail to identify the edges of some elements,  
409 resulting in the inclusion of functionally constrained sequence in the analysis windows close to  
410 CNEs. This factor was not incorporated in our simulations, so in order to correct for this  
411 constraint, allowing us to compare diversity around CNEs in *M. m. castaneus* with our  
412 simulation data, we scaled values as follows. We divided nucleotide diversity by between-  
413 species divergence, in this case mouse-rat divergence, giving a statistic ( $\pi/d_{rat}$ ) that reflects  
414 diversity corrected for mutation rate variation. We then multiplied the  $\pi/d_{rat}$  values by the mean  
415 mouse-rat divergence in regions further than 3Kbp from the edges of CNEs to obtain values on  
416 the same scale as our simulation data.



442 generations since the two-species shared a common ancestor and  $\mu$  is the mutation rate per  
443 base pair per generation. In the simulations, the mutation rate was  $2.075 \times 10^{-6} \text{ bp}^{-1}$  (recall that  
444 we scaled mutations rates using an estimate of  $4N_e\mu$ ) and since  $K_{rat} = 0.15$ ,  $T = 36,145$   
445 generations. We thus ran simulations incorporating both deleterious and advantageous  
446 mutations, focussing on exons, for 46,145 generations, discarding the first 10,000 as burn-in. At  
447 the final generation, we constructed the uSFS for synonymous and nonsynonymous sites from  
448 20 randomly sampled haploid chromosomes. To obtain a proxy for mouse-rat divergence, we  
449 counted all substitutions that occurred after the  $10N_{sim}$  burn-in phase plus any derived alleles  
450 present in all 20 haploid chromosomes.

451  
452 Using the uSFSs for synonymous and nonsynonymous sites obtained from the  
453 simulations, we estimated selection parameters using the methods described above. We first  
454 fitted one-, two- and three- epoch demographic models to simulated synonymous site data. For  
455 the simulations assuming Model A or Model B, we found that the three-epoch demographic  
456 model gave the best fit to the simulated synonymous site uSFS in both cases. Using the  
457 expected uSFS under the three-epoch model, we performed the demographic correction  
458 (Supplementary Methods) before estimating selection parameters. When estimating selection  
459 parameters based on simulation data, we used the same methods as used for the analysis of  
460 the *M. m. castaneus* data, i.e. the DFE for Model A simulations was estimated using Model A  
461 *etc.*

462  
463 **5. Patterns of diversity around recent nonsynonymous and synonymous**  
464 **substitutions**

465  
466 Comparisons of the average level of nucleotide diversity around recent synonymous and  
467 nonsynonymous substitutions have been used to test for positive selection [17-21]. In *M. m.*

468 *castaneus* there is essentially no difference in diversity around recent substitutions at 0-fold and  
469 4-fold sites [20]. This could reflect a paucity of SSWs, or alternatively, this particular test may be  
470 unable to discriminate between BGS and SSWs in mice. Using our simulation data, in which  
471 SSWs are relatively frequent, we tested whether patterns of diversity around selected and  
472 neutral substitutions reveals the action of positive selection. In their study, Halligan *et al.* [20]  
473 used *M. famulus* as an outgroup to locate recent substitutions, because it is much more closely  
474 related to *M. musculus* than the rat. We obtained the locations of nucleotide substitutions in our  
475 simulations as follows. Neutral divergence between *M. m. castaneus* and *M. famulus* ( $K_{fam}$ ) is  
476 3.4%. In the simulations, given that the mutation rate was  $2.075 \times 10^{-6}$ , 8,193 generations are  
477 sufficient to approximate the *M. m. castaneus* lineage since its split with *M. famulus*  $K_{fam}$ . Thus,  
478 all substitutions that occurred in 8,193 generations were analysed. Neutral diversity around  
479 synonymous and nonsynonymous substitutions in non-overlapping windows of 1,000bp up to  
480 100Kbp from substituted sites were then extracted from the simulations. Sites in analysis  
481 windows that overlapped with functional elements were excluded. If two substitutions of the  
482 same type were located less than 100Kbp apart, analysis windows extended only to the  
483 midpoint of the two sites.

484

485         Except where noted, all analyses were conducted using custom Python and Perl scripts  
486 (available on request).

487

488

489

490

## 491 **Results**

492 To investigate genetic variation around functional elements in house mice, we analysed  
493 the genomes of 10 wild-caught individuals that had been sequenced to high coverage [20]. We  
494 compared nucleotide polymorphism and between-species divergence in three classes of  
495 functional sites (0-fold sites, UTRs and CNEs) with polymorphism and divergence at linked,  
496 putatively neutral sequences (4-fold sites and CNE-flanks). The three classes of functional sites  
497 had lower levels of within-species polymorphism and between-species divergence than their  
498 neutral comparators (Table 1). This is the expected pattern if natural selection keeps deleterious  
499 alleles at low frequencies, preventing them from reaching fixation. Tajima's  $D$  is more negative  
500 for 0-fold sites, UTRs and CNEs than for their neutral comparators (Table 1), further indicating  
501 the action of purifying selection in those classes of sites. It is notable that the two neutral site  
502 types exhibited negative Tajima's  $D$ , indicating that rare variants are more frequent than  
503 expected in a Wright-Fisher population (Table 1). This is consistent either with a recent  
504 population expansion or the widespread effects of selection on linked sites, both of which may  
505 be relevant for this population [20, 44].

506

507 **Table 1. Summary statistics for five classes of sites in *M. m. castaneus*.** All values refer to  
508 non-CpG prone sites. Nucleotide divergences between *M. m. castaneus* and *M. famulus* ( $d_{fam}$ )  
509 and between *M. m. castaneus* and *R. norvegicus* ( $d_{rat}$ ) were estimated by maximum likelihood  
510 using the method described in [31].

511

|                  | $\pi$ (%) | Tajima's $D$ | $d_{fam}$ (%)* | $d_{rat}$ (%)* | Sites (Mb) |
|------------------|-----------|--------------|----------------|----------------|------------|
| <i>0-fold</i>    | 0.134     | -0.763       | 0.239          | 2.93           | 10.2       |
| <i>4-fold</i>    | 0.628     | -0.627       | 1.06           | 12.7           | 1.49       |
| <i>CNE</i>       | 0.274     | -1.03        | 0.418          | 3.67           | 24.6       |
| <i>CNE flank</i> | 0.670     | -0.602       | 1.03           | 13.8           | 17.8       |
| <i>UTR</i>       | 0.438     | -0.702       | 0.802          | 10.0           | 11.3       |

512

513

514

515 **Inferring the unfolded site frequency spectrum**

516

517 The distribution of derived allele frequencies in a class of sites (the unfolded site  
518 frequency spectrum - uSFS) potentially contains information on the frequency and strength of  
519 selected mutations. We estimated the uSFSs for 0-fold sites, UTRs and CNEs using a  
520 probabilistic method incorporating information from two outgroup species [31]. This method  
521 attempts to correct for biases that are inherent in parsimony methods.

522

523 A population's demographic history is expected to affect the shape of the SFS. DFE-  
524 alpha attempts to correct this by fitting a population size change model to the neutral site class,  
525 and, conditional on the estimated demographic parameters, estimates the DFE for linked,  
526 selected sites. In the case of 4-fold sites and CNE flanks, a 3-epoch model provided the best fit  
527 to the data, based on likelihood ratio tests (Table S1) The trajectories of the inferred population  
528 size changes were similar in each case, i.e. a population bottleneck followed by an expansion  
529 (Table S2). However, the magnitude of the changes and the duration of each epoch differed  
530 somewhat (Table S2). A possible explanation is that the demographic parameter estimates are  
531 affected by selection at linked sites, which differs between site classes [45-47].

532

533 We found that the 4-fold site and CNE-flank uSFSs exhibited an excess of high  
534 frequency derived alleles relative to expectations under the best-fitting neutral demographic  
535 models (Figure S1). For example,  $\chi^2$ -statistics for the difference between the observed and  
536 fitted number of sites for the last uSFS element (i.e. 19 derived alleles) were 245.9 and 505.6  
537 for 4-fold sites and CNE-flanks, respectively. It is reasonable to assume that the differences  
538 between fitted and observed values are caused by processes that similarly affect the linked  
539 selected site class. We therefore corrected the 0-fold, UTR and CNE uSFSs by subtracting the  
540 proportional deviations between fitted and observed values for neutral site uSFSs prior to

541 estimating selection parameters (see Supplementary Methods). Applying this correction  
542 (hereafter referred to as the demographic correction) appreciably reduced the proportion of high  
543 frequency derived variants (Figure 1).

544

#### 545 **Estimating the frequencies and strengths of deleterious and advantageous mutations**

546

547 We inferred the DFE for harmful mutations (dDFE) and the rate and strength of  
548 advantageous mutations based on the uSFSs for the three different classes of functional sites  
549 using DFE-alpha under two different models (Table 2). The first, as described by Schneider *et*  
550 *al.* [25], makes use of the full uSFS, including sites fixed for the derived allele (hereafter Model  
551 A). The second (hereafter Model B), incorporated an additional parameter that absorbs the  
552 contribution of sites fixed for the derived allele (see Supplementary Methods). This was  
553 motivated by the possibility that between-species divergence may be decoupled from within-  
554 species polymorphism (e.g. due to changing selection regimes), and this could lead to spurious  
555 estimates of selection parameters [26, 48]. Since Model A is nested within Model B, the two can  
556 be compared using likelihood ratio tests. In the remainder of the study, results obtained under  
557 Model A are shown in parallel with results obtained under Model B.

558

559 **Table 2. Parameter estimates for the distribution of fitness effects for three classes of**  
560 **sites in *M. m. castaneus* obtained under two models.** The first (Model A) estimates of  
561 selection parameters based on the full uSFS. Under the second method (Model B), sites fixed  
562 for the derived allele were prevented from influencing estimates of selection parameters. The  
563 bracketed values are 95% confidence intervals obtained from profile likelihoods. The  
564 parameters shown are:  $p_i$  = the proportion of mutations falling into the  $i^{th}$  deleterious class;  $N_e s_i$   
565 = the scaled homozygous selection coefficient of the  $i^{th}$  deleterious class;  $p_a$  = the proportion of

566 advantageous mutations;  $N_{e}s_a$  = the scaled homozygous selection coefficient of the  
 567 advantageous mutation class.

| <b>Model A: DFE inferred from the full uSFS</b>                                             |                             |                             |                             |
|---------------------------------------------------------------------------------------------|-----------------------------|-----------------------------|-----------------------------|
|                                                                                             | <b>0-fold</b>               | <b>UTR</b>                  | <b>CNE</b>                  |
| $N_{e}s_1$                                                                                  | -0.045                      | -0.097                      | -0.323                      |
| $p_1$                                                                                       | 0.191                       | 0.701                       | 0.352                       |
| $N_{e}s_2$                                                                                  | -104                        | -39.1                       | -3.98                       |
| $p_2$                                                                                       | 0.806                       | 0.286                       | 0.278                       |
| $N_{e}s_3$                                                                                  | -                           | -                           | -77.9                       |
| $p_3$                                                                                       | -                           | -                           | 0.360                       |
| $N_{e}s_a$                                                                                  | 7.27<br>[4.62 – 11.7]       | 5.32<br>[3.91 – 7.03]       | 9.17<br>[7.00 – 20.9]       |
| $p_a$                                                                                       | 0.0030<br>[0.0019 – 0.0048] | 0.013<br>[0.0097 – 0.019]   | 0.0098<br>[0.0037 – 0.0099] |
| <b>Model B: Sites fixed for the derived allele do not contribute to parameter estimates</b> |                             |                             |                             |
|                                                                                             | <b>0-fold</b>               | <b>UTR</b>                  | <b>CNE</b>                  |
| $N_{e}s_1$                                                                                  | -0.171                      | -0.160                      | -0.253                      |
| $p_1$                                                                                       | 0.184                       | 0.689                       | 0.342                       |
| $N_{e}s_2$                                                                                  | -100                        | -32.0                       | -3.84                       |
| $p_2$                                                                                       | 0.806                       | 0.281                       | 0.286                       |
| $N_{e}s_3$                                                                                  | -                           | -                           | -76.3                       |
| $p_3$                                                                                       | -                           | -                           | 0.365                       |
| $N_{e}s_a$                                                                                  | 8.30<br>[6.24 – 10.1]       | 6.96<br>[5.53 – 8.69]       | 8.60<br>[4.37 – 12.6]       |
| $p_a$                                                                                       | 0.010<br>[0.0030 – 0.0183]  | 0.0294<br>[0.0181 – 0.0436] | 0.008<br>[0.0004 – 0.0100]  |

568  
569

570 We performed a comparison of different DFE models, including discrete distributions that  
 571 have one, two or three mutational effect classes and the gamma distribution including or not  
 572 including advantageous mutations. For each class of functional sites, DFE models with several  
 573 classes of deleterious mutational effects and a single class of advantageous effects gave the



574 best fit (Table S3). For each class of functional sites, only a single class of advantageous  
575 mutations was supported, since additional classes of advantageous mutations did not  
576 significantly increase likelihoods (Table S4). This presumably reflects a lack of power. These  
577 best-fitting models were identified whether we estimated the DFE under Model A or Model B.  
578 Parameter estimates pertaining to the dDFE were also similar between Models A and B (Table  
579 2).

580

581 In our current study, we estimated selection parameters based on the uSFS, whereas  
582 earlier studies on mice used the distribution of minor allele frequencies, i.e. the ‘folded’ SFS [20,  
583 27, 49-51]. A possible consequence of using the folded SFS is that advantageous mutations  
584 segregating at intermediate to high frequencies are allocated to the mildly deleterious class. In  
585 the case of 0-fold sites, for example, the best-fitting DFE did not include mutations with scaled  
586 effects in the range of  $1 < |N_e s| < 100$  (Table 2). This contrasts with previous studies using the  
587 folded SFS which found an appreciable proportion of mutations in the  $1 < |N_e s| < 100$  range [20,  
588 38]. Because this difference may have an effect on the reductions in diversity caused by  
589 background selection, we performed simulations incorporating either the gamma dDFEs inferred  
590 from analysis of the folded SFS by Halligan *et al.* [20] or the discrete dDFEs inferred in the  
591 present study (results below).

592

593 For all classes of functional sites, we inferred that moderately positively selected  
594 mutations are fairly frequent under both Models A and B (Table 2). In the case of 0-fold sites, for  
595 example, the frequency of advantageous mutations was 0.3% (under Model A). Across the  
596 three classes of sites, the average scaled selection strengths of advantageous mutations were  
597 fairly similar (Table 2), i.e.  $N_e s \sim 8$ , implying that  $s$  is on the order of  $10^{-5}$  (assuming  $N_e =$   
598 500,000; [42]). We found that estimates of the frequency of advantageous mutations ( $p_a$ )  
599 obtained under Model B for 0-fold sites and UTRs were  $\sim 3$  times higher than those obtained

600 under Model A. Confidence intervals overlapped, however (Table 2). In the cases of both 0-fold  
601 sites and UTRs, Model B fitted significantly better than Model A, as judged by likelihood ratio  
602 tests (0-fold sites,  $\chi^2_{1 \text{ d.f.}} = 4.2$ ;  $p = 0.04$ ; UTRs,  $\chi^2_{1 \text{ d.f.}} = 9.9$ ;  $p = 0.002$ ). Interestingly, in the case  
603 of CNEs, Models A and B did not differ significantly in fit ( $\chi^2_{1 \text{ d.f.}} = 0.26$ ;  $p = 0.60$ ) and estimates  
604 of the advantageous mutation parameters were very similar (Table 2).

605

### 606 **Forward-in-time population genetic simulations**

607

608 We conducted forward-in-time simulations to examine whether estimates of the DFE  
609 obtained by analysis of the uSFS predict patterns of diversity observed around functional  
610 elements. In our simulations, we used estimates of selection parameters obtained by DFE-alpha  
611 for 0-fold sites, UTRs and CNEs, assuming either Model A (i.e. from the full uSFS) or Model B  
612 (i.e. by absorbing the contribution of sites fixed for the derived allele with an additional  
613 parameter). The selection parameter estimates obtained under Models A and B resulted in  
614 major differences in the patterns of diversity around functional elements.

615

#### 616 ***i) Patterns of nucleotide diversity around functional elements in simulated*** 617 ***populations***

618

619 Using the selection parameter estimates obtained from DFE-alpha (Table 2), we  
620 performed simulations incorporating deleterious mutations, advantageous mutations or both  
621 advantageous and deleterious. Our analysis involved computing diversity in windows  
622 surrounding functional elements and comparing the diversity patterns with those seen in *M. m.*  
623 *castaneus*. In order to aid visual comparisons, we divided nucleotide diversity ( $\pi$ ) at all positions  
624 by the mean  $\pi$  at distances greater than 75Kbp and 4Kbp away from exons and CNEs,

625 respectively. These distances were chosen as they are the approximate values beyond which  $\pi$   
626 remains constant.

627

628 Simulations incorporating only deleterious mutations predicted a chromosome-wide  
629 reduction in genetic diversity. Around exons and CNEs diversity plateaued at values that were  
630 ~94% of the neutral expectation (Figures S2-3). However, simulations involving only BGS did  
631 not fully predict the observed troughs in diversity around functional elements. The predicted  
632 troughs in diversity around both protein-coding exons and CNEs, were not as wide nor as deep  
633 as those observed in the real data (Figures 2-3). Similar predictions were obtained for Models A  
634 or B (Figures 2-3) or for the gamma dDFEs inferred by Halligan *et al.* [20] (Figure S4). Our  
635 simulations incorporating deleterious mutations suggest, then, that while BGS affects overall  
636 genetic diversity across large portions of the genome, but positive selection presumably also  
637 makes a substantial contribution to the dips in diversity around functional elements.

638 In our simulations of exons and surrounding regions, recurrent SSWs produced troughs  
639 in diversity, but they were both narrower and shallower than those observed in the house  
640 mouse. However, the results are sensitive to the model used to estimate selection parameters  
641 (Figure 2; Table 3). Assuming the selection parameters estimated under Model A (i.e. analysing  
642 the full uSFS) we found that advantageous mutations produced a small dip in diversity around  
643 exons, which was shallower and narrower than the one generated by deleterious mutations  
644 alone (Figure 2; Table 3). In contrast, the advantageous mutation parameters estimated under  
645 Model B (i.e. where sites fixed for the derived allele do not influence selection parameters)  
646 resulted in a marked trough in diversity around exons in simulations (Figure 2; Table 3). In  
647 simulations that incorporated both advantageous and deleterious mutations, the troughs in  
648 diversity around exons were not as large as those observed in *M. m. castaneus* (Figure 2; Table  
649 3). However, assuming Model B selection parameters resulted in a trough in diversity that was  
650 both deeper and wider than the one generated when assuming Model A parameters (Figure 2).

651 The differences between Model A simulations and Model B simulations presumably arise  
 652 because under Model B the frequency of advantageous nonsynonymous mutations was ~3  
 653 times higher than under Model A (Table 2).

654

655 **Table 3. The root mean square difference between values of  $\pi$  around functional**

656 **elements predicted in simulations and  $\pi$  observed in *M. m. castaneus*. Confidence**

657 intervals were obtained from 1,000 bootstrap samples (see *Methods*).

658

|                |                               | <b>Exons</b> |                 | <b>CNEs</b> |                 |
|----------------|-------------------------------|--------------|-----------------|-------------|-----------------|
|                |                               | Median       | 95% range       | Median      | 95% range       |
| <b>Model A</b> | <i>Deleterious Mutations</i>  | 0.0327       | 0.0311 - 0.0343 | 0.0164      | 0.0151 - 0.0179 |
|                | <i>Advantageous Mutations</i> | 0.0422       | 0.0403 - 0.0442 | 0.0177      | 0.0161 - 0.0195 |
|                | <i>Both</i>                   | 0.0312       | 0.0297 - 0.0340 | 0.0100      | 0.0088 - 0.0113 |
| <b>Model B</b> | <i>Deleterious Mutations</i>  | 0.0331       | 0.0314 - 0.0351 | 0.0157      | 0.0144 - 0.0171 |
|                | <i>Advantageous Mutations</i> | 0.0380       | 0.0355 - 0.0406 | 0.0162      | 0.0147 - 0.0179 |
|                | <i>Both</i>                   | 0.0274       | 0.0253 - 0.0294 | 0.0088      | 0.0078 - 0.0101 |

659

660 We also carried out simulations focussing on CNEs and found that the combined effects  
 661 of BGS and recurrent SSWs, as generated by our estimates of selection parameters, can  
 662 explain patterns of diversity observed in *M. m. castaneus* (Figure 3; Table 3). Selection  
 663 parameters obtained under Models A and B produced similar results. The troughs in diversity  
 664 around CNEs in simulations incorporating only advantageous mutations were similar to the ones  
 665 generated by deleterious mutations alone (Figure 3; Table 3). Although both processes are  
 666 required to explain the patterns observed in mice, our simulations suggest that BGS makes a  
 667 bigger contribution to the overall reduction in neutral diversity than SSWs (Figure S3). The  
 668 troughs in diversity around CNEs in our simulations were slightly shallower than those observed

669 in the mouse genome (Figure 3), perhaps suggesting that we failed to detect infrequent,  
670 strongly selected advantageous mutations in CNEs or that we slightly underestimated the true  
671 frequency of advantageous mutations occurring in those elements.

672

### 673 **ii) The site frequency spectrum around functional elements**

674

675 SSWs and BGS are known to affect the shape of the SFS for linked neutral sites [32, 33,  
676 52]. SSWs and BGS generate troughs in diversity at linked sites (Figures 2-3), but nucleotide  
677 diversity on its own does not contain information about the shape of the SFS. Tajima's  $D$  is a  
678 useful statistic for this purpose, because it is reduced when there is an excess of rare  
679 polymorphisms relative to the neutral expectation and increased when intermediate frequency  
680 variants are more common [53]. We therefore compared Tajima's  $D$  in the regions surrounding  
681 functional elements in simulations with values observed in the real data. It is notable that  
682 average Tajima's  $D$  is far lower in *M. m. castaneus* than in our simulations (Figure 4). This likely  
683 reflects a genome-wide process, such as population size change, that we have not modelled.

684

685 If we assume selection parameters obtained under Model A, Tajima's  $D$  around protein-  
686 coding exons is relatively invariant, and matches the pattern observed in the real data fairly well  
687 (Figure 4). However, under Model B, the simulations exhibit a substantial dip in Tajima's  $D$ ,  
688 which is not observed in the real data (Figure 4).

689

690 In the case of CNEs, we observed a trough in Tajima's  $D$  in the real data (Figure 4), and  
691 simulations predict similar troughs under Models A and B (Figure 4). However, the trough in  
692 Tajima's  $D$  may be caused by the presence of functionally constrained sequences in the  
693 immediate flanks of CNEs (See *Methods*), making a comparison between the simulations and  
694 the observed data problematic.

695

696 **iii) Rates of substitution in functional elements**

697

698 Incorporating information from sites fixed for the derived allele when estimating the DFE  
699 (as in Model A) or disregarding this information (as in Model B) had a striking effect on  
700 estimates of the frequency and effects of advantageous mutations (Table 2). In the case of 0-  
701 fold sites, for example,  $p_a$  was  $\sim 3x$  higher under Model B than Model A (Table 2). We then  
702 investigated the extent by which such differences affect the divergence at selected sites under  
703 the two models. Nucleotide divergence at putatively neutral sites between the mouse and the rat  
704 is approximately 15%, so we simulated an expected neutral divergence of 7.5% for one lineage.

705

706 We compared the ratio of nucleotide divergence at selected sites to the divergence at  
707 neutral sites ( $d_{sel}/d_{neut}$ ) between the simulated and observed data. In simulations that assumed  
708 the estimates of selection parameters obtained under Model A,  $d_{sel}/d_{neut}$  values were similar to  
709 those observed in *M. m. castaneus* for all classes of selected sites (Table 4). Under Model B,  
710 however, the simulations predicted substantially more substitutions at nonsynonymous sites and  
711 UTRs than were seen in the real data (Table 4). This suggests that, under Model B,  $p_a$  for 0-fold  
712 sites and UTRs may be overestimated.

713

714

715

716

717

718

719

720

721 **Table 4. Comparison of the accumulation of nucleotide divergence in simulated**  
722 **populations between different functional site types.** In the cases of 0-fold sites and UTRs,  
723  $d_{neu}$  refers to 4-fold sites. For CNEs,  $d_{neu}$  refers to CNE flanking sites. In all simulations,  $d_{neu}$  was  
724 set to 7.5%.

725

| Site Class    | <i>M. m. castaneus</i><br>$d_{se}/d_{neu}$ | Simulation DFE |                  |         |                  |
|---------------|--------------------------------------------|----------------|------------------|---------|------------------|
|               |                                            | Model A        |                  | Model B |                  |
|               |                                            | $d$ (%)        | $d_{se}/d_{neu}$ | $d$ (%) | $d_{se}/d_{neu}$ |
| <i>0-fold</i> | 0.225                                      | 1.66           | 0.221            | 2.26    | 0.301            |
| <i>UTR</i>    | 0.757                                      | 5.76           | 0.767            | 6.85    | 0.914            |
| <i>CNE</i>    | 0.406                                      | 3.31           | 0.440            | 3.07    | 0.409            |

726

727 **iv) Re-estimating the DFE from simulated data**

728

729 BGS and SSWs both perturb allele frequencies at linked neutral sites, and this can lead  
730 to the inference of spurious demographic histories [45-47]. By fitting a model incorporating three  
731 epochs of population size to the putatively neutral site data, we inferred that *M. m. castaneus*  
732 has experienced a population bottleneck followed by an expansion (Table S2). To investigate  
733 the possibility that the inferred demographic histories could be an artefact of selection at linked  
734 sites, we fitted demographic models to the uSFS obtained from simulated synonymous sites.  
735 Simulations assumed the selection parameters obtained under either Model A or B, and in each  
736 case, the 3-epoch model gave the best fit to the data. The estimated demographic parameters  
737 inferred were somewhat different between simulations assuming Model A or Model B selection  
738 parameters, but in each case a population bottleneck followed by an expansion was inferred  
739 (Table S5). This is an interesting observation, since our simulations assumed a constant  
740 population size, but selection at linked sites appears to distort the neutral site uSFS, and a  
741 demographic history is estimated as the one inferred from the real data (Table S5).

742

743 Our simulations also indicate that selection parameters are difficult to accurately infer  
744 using the uSFS alone. In the case of Model A simulations, the selection strength and frequency  
745 of deleterious mutations was accurately estimated, as was the combined frequency of all  
746 effectively neutral mutations (Table S5). However, in Model A simulations, DFE-alpha did not  
747 accurately estimate the strength and frequency of advantageous mutations. Estimates of  
748 selection parameters in Model B simulations were similar to the input parameters, but a notable  
749 exception was that the frequency of advantageous mutations ( $p_a$ ) was overestimated (Table  
750 S5). A possible explanation for this is that the demographic correction we applied to the uSFS  
751 for selected sites (see Supplementary Methods) may not fully capture the effects of selection at  
752 linked sites. SSWs increase the proportions of high frequency derived alleles [32], and it is  
753 possible that their contribution to the uSFS for selected sites was partially unaccounted for,  
754 creating the appearance of more frequent advantageous mutations in the uSFS.

755

756 **v) Patterns of diversity around sites that have recently experienced a substitution**

757

758 In general, it has been difficult to discriminate between BGS and SSWs, because their  
759 effects on genetic diversity and the site frequency spectrum are qualitatively similar. One  
760 method that has been suggested as a means of teasing the two processes apart takes  
761 advantage of the fact that hard SSWs should be centred on a nucleotide substitution, whereas  
762 this is not the case for BGS. Comparing the average genetic diversity in regions surrounding  
763 recent putatively selected and putatively neutral substitutions (e.g. 0-fold and 4-fold sites,  
764 respectively) may therefore reveal the action of SSWs [17, 19]. Halligan *et al.* [20] performed  
765 such an analysis in *M. m. castaneus* using the closely related *M. famulus* as an outgroup, and  
766 found that the profiles of neutral diversity around 0-fold and 4-fold substitutions were virtually  
767 identical. Similar findings have been reported in other species [19, 21]. One interpretation of



768 these results is that hard SSWs are rare. To investigate this, we measured the average neutral  
769 diversity around nonsynonymous and synonymous substitutions in simulations for the case of  
770 frequent hard SSWs.

771

772 In our simulations, we measured diversity around substitutions occurring on a time-scale  
773 that is equivalent to the divergence time between *M. m. castaneus* and *M. famulus*. The  
774 average diversities around nonsynonymous and synonymous substitutions in the simulated data  
775 were very similar, regardless of whether simulations assumed the selection parameters  
776 estimated under Model A or Model B (Figure 5). However, the troughs in diversity around  
777 substitutions were deeper in the simulations assuming Model B (Figure 5), reflecting the higher  
778 frequency of advantageous mutations (Table 2). In the immediate vicinity of nonsynonymous  
779 substitutions, diversity was lower than the corresponding value for synonymous substitutions  
780 (Figure 5). However, the differences are slight, so it would be difficult to draw firm conclusions  
781 about the action of either SSWs or BGS. Taken together, these results suggest that analysing  
782 patterns of diversity around recent substitutions does not provide enough information that can  
783 convincingly discriminate between SSWs and BGS in *M. m. castaneus*, even when hard sweeps  
784 are fairly frequent. Further analysis is required to assess whether this is also the case for other  
785 organisms.

786

## 787 Discussion

788 There are a number of observations suggesting that natural selection is pervasive in the  
789 murid genome. First, there is a positive correlation between synonymous site diversity and the  
790 rate of recombination [44]. Secondly, there is reduced diversity on the X-chromosome compared  
791 to the autosomes, which cannot readily be explained by neutral or demographic processes [28].  
792 Thirdly, there are troughs in genetic diversity surrounding functional elements, such as protein-

793 coding exons and CNEs, which are consistent with the action of background selection (BGS)  
794 and/or SSWs [20]. In this paper, we analysed the genome sequences of 10 *M. m. castaneus*  
795 individuals sampled from the ancestral range of the species [20]. We estimated the DFEs for  
796 several classes of functional sites (0-fold nonsynonymous sites, UTRs and CNEs), and used  
797 these estimates to parameterise forward-in-time simulations. We investigated whether the  
798 simulations predict the observed troughs in diversity around functional elements along with the  
799 between-species divergence observed between mice and rats.

800

### 801 **Estimating selection parameters based on the uSFS**

802

803 Relative to putatively neutral comparators, 0-fold sites, UTRs and CNEs all exhibit  
804 reduced nucleotide diversity, reduced nucleotide divergence and an excess of low frequency  
805 variants (Table 1; Figure 1), consistent with the action of natural selection [20, 27]. The  
806 estimates of the DFEs included substantial proportions of strongly deleterious mutations (Table  
807 2). In addition, the best-fitting models also included a single class of advantageous mutations.  
808 Additional classes were not statistically supported, however. In reality, there is almost certainly a  
809 distribution of advantageous selection coefficients [54, 55]. A visual examination of the fitted and  
810 observed uSFSs, however, shows that the best-fitting DFEs fit the data very well (Figure S5),  
811 suggesting that there is limited information in the uSFS to estimate a range of positive selection  
812 coefficients.

813

814 When estimating the DFE for a particular class of sites, we analysed either the full uSFS  
815 including sites fixed for the derived allele (Model A) or we ignored sites fixed for the derived  
816 allele (i.e. Model B). Recently, Tataru *et al.* [26] used simulations to show that selection  
817 parameters can be accurately estimated from the uSFS, whilst ignoring between-species  
818 divergence, if  $p_a$  is sufficiently high. In our analysis of 0-fold sites and UTRs, Model B gave a

819 significantly better fit and higher estimates of the frequency of advantageous mutations ( $p_a$ ) than  
820 Model A (Table 2). For CNEs, however, Models A and B did not significantly differ in fit, and the  
821 selection parameter estimates were very similar (Table 2). The goodness-of-fit and parameter  
822 estimates obtained under Models A and B may differ if the processes that generated between  
823 species-divergence are decoupled from the processes that produce within species diversity.  
824 There are several factors that could potentially cause this decoupling. 1) Past demographic  
825 processes may have distorted the uSFS in ways not captured by the corrections we applied; 2)  
826 there may be error in assigning alleles as ancestral or derived; 3) the nature of the DFE may  
827 have changed in the time since the accumulation of between-species divergence began; and 4)  
828 there could be rare, strongly advantageous mutations that contribute to divergence, but  
829 contribute negligibly to polymorphism. It is difficult to know which of these factors affected the  
830 outcome of our analyses. However, we found that Model B gave a better fit to the uSFS than  
831 Model A for 0-fold sites and UTRs, but not CNEs. In addition, we that found that the selection  
832 parameters obtained fail to explain the patterns of diversity around protein-coding exons,  
833 whereas they explain the patterns of diversity around CNEs, so we think the latter explanation is  
834 likely to have been important.

835

### 836 **Patterns of diversity and Tajima's D around functional elements**

837

838 We performed simulations incorporating our estimates of deleterious and advantageous  
839 mutation parameters to dissect the contribution of BGS and selective sweeps to patterns of  
840 diversity around functional elements. We found that BGS does not fully explain the troughs in  
841 diversity observed around either protein-coding exons or CNEs (Figures 2-3). These results are  
842 consistent with Halligan *et al.* [20].

843

844 Our simulations suggest that BGS and SSWs both produce genome-wide reductions in  
845 neutral diversity (Figures S3-4), but neither process on its own fully explains the troughs in  
846 diversity around protein-coding exons and CNEs, regardless of which model (A or B) is used to  
847 estimate selection parameters (Figures 2-3). Around protein-coding exons, the combined effects  
848 of advantageous and deleterious mutations generated a shallower trough in diversity than the  
849 one observed (Figure 2). A possible explanation for this is that rare, strongly selected  
850 advantageous mutations are undetectable by analyses based on the uSFS (discussed below).  
851 In contrast, the combined effects of BGS and SSWs predicted troughs in diversity surrounding  
852 CNEs that closely match those observed (Figure 3).

853

854 There is an overall excess of rare variants in *M. m. castaneus* relative to neutral  
855 expectation, as indicated by a strongly negative Tajima's *D* at putatively neutral sites (Table 1)  
856 and in the regions surrounding exons and CNEs (Figure 4). Our simulations incorporating both  
857 advantageous and deleterious mutations also exhibited negative Tajima's *D*, but not nearly so  
858 negative as in the real data (Figure 4). This difference between the observed data and the  
859 simulations indicates that there may be processes generating an excess of rare variants, such  
860 as a recent population expansion, which were not incorporated in the simulations.

861

### 862 **Rates of nucleotide substitutions in simulations**

863

864 Our simulations suggest that the frequency of advantageous mutations ( $p_a$ ) estimated for  
865 0-fold sites and UTRs under Model B may be unrealistically high. This is because several  
866 aspects of the results were incompatible with the observed data. Firstly, we found that the  
867 substitution rates for simulated nonsynonymous and UTR sites were higher than those  
868 observed between mouse and rat (Table 4). Secondly, we observed a pronounced dip in  
869 Tajima's *D* around simulated exons, which is not present in the real data (Figure 4), suggesting

870 that under Model B, either the strength or frequency of positive selection at 0-fold sites is  
871 overestimated.

872

873 **Do our results provide evidence for strongly selected advantageous mutations?**

874

875 Estimation of the rate and frequency of advantageous mutations based on the uSFS  
876 relies on the presence of advantageous variants segregating within the population [23, 25, 26].  
877 The frequency of advantageous mutations may impose a limit on the parameters of positive  
878 selection that can be accurately estimated. Indeed, Tataru *et al.* [26] recently showed that  $p_a$   
879 may be overestimated when analysing the uSFS, if the true value of  $p_a$  is low.

880

881 Advantageous mutations with large effects have shorter sojourn times than those with  
882 milder effects [56, 57]. If strongly selected advantageous mutations are infrequent, it is therefore  
883 unlikely that they would be observed to be segregating. This could explain why the estimated  
884 selection parameters fail to predict the deep troughs in diversity around exons that we observe  
885 in the real data (Figure 2). Furthermore, the fact that Model B gave a better fit than Model A for  
886 0-fold sites and UTRs suggests that polymorphism and divergence have become decoupled for  
887 those sites. This is also consistent with the presence of infrequent, strongly selected mutations  
888 that become fixed rapidly and are thus not commonly observed as polymorphisms.

889

890 Relevant to this point, an interesting comparison can be made between two recent  
891 studies to estimate the frequency and strength of positive selection using the same  $D$ .  
892 *melanogaster* dataset. The first, by Keightley *et al.* [31], utilised the uSFS analysis methods of  
893 Schneider *et al.* [25] (i.e. Model A in the present study), and estimated the frequency of  
894 advantageous mutations ( $p_a$ ) =  $4.5 \times 10^{-3}$  and the scaled strength of selection ( $N_e s_a$ ) = 11.5 for  
895 0-fold nonsynonymous sites. The second study, by Campos *et al.* [43], estimated  $p_a = 2.2 \times 10^{-4}$

896 and  $N_e s_a = 241$ , based on the correlation between synonymous site diversity and  
897 nonsynonymous site divergence. Although the individual parameter estimates differ  
898 substantially, the compound parameter  $N_e s_a \rho_a$  (which approximates the rate of SSWs) was  
899 similar between the studies (0.055 and 0.052 for Campos *et al.* [43] and Keightley *et al.* [31]  
900 respectively). It is expected that synonymous site diversity is reduced by SSWs, so the method  
901 used by Campos *et al.* [43] may be sensitive to the presence of strongly selected mutations,  
902 whereas the Keightley *et al.* [31] approach may have been more sensitive to weakly selected  
903 mutations. It seems plausible then, that the two studies capture different aspects of the DFE for  
904 advantageous mutations (a similar argument was made by Sella *et al.* [58]). Supporting this  
905 view, Elyashiv *et al.* [5] recently estimated the DFE in *D. melanogaster*, incorporating both  
906 strongly and weakly selected advantageous mutations, by fitting a model incorporating BGS and  
907 SSWs to genome-wide variation in genetic diversity. They inferred that weakly selected  
908 mutations are far more frequent than strongly selected ones. In the present study, we used  
909 similar methods as Keightley *et al.* [31] to estimate the frequency and strength of advantageous  
910 mutations, so the estimated parameters of positive selection may represent only weakly  
911 selected mutations. Indeed, patterns of diversity at microsatellite loci suggest that there are  
912 strongly selected, infrequent sweeps in multiple European *M. musculus* populations [59], so  
913 infrequent strong sweeps may be a general feature of mouse evolution.

914

915 The patterns of diversity and Tajima's  $D$  around CNEs and the nucleotide divergence  
916 within CNEs in our simulated populations were similar to those observed in the *M. m. castaneus*  
917 data, regardless of which estimate of the DFE we used (i.e. Model A or B) (Figure 3-4; Table 3).  
918 This suggests that the four classes of mutational effects inferred provide a reasonable  
919 approximation for the full distribution of fitness effects for CNEs.

920

921           Understanding the contributions of regulatory and protein change to phenotypic  
922 evolution has been an enduring goal in evolutionary biology [60-62]. If selection is strong  
923 relative to drift (i.e.  $N_e s_a > 1$ ) then the rate of change of fitness due to advantageous mutations is  
924 expected to be proportional to the square of the selection coefficient [63]. In this study, we  
925 inferred that the strength of selection acting on new advantageous mutations in CNEs and 0-fold  
926 sites are roughly equivalent, but that advantageous mutations occur more frequently in CNEs  
927 (Table 2). Given that there are more CNE nucleotides in the genome than there are 0-fold sites  
928 (Table 1), this could imply that adaptation at regulatory sites causes the greatest fitness change  
929 in mice. However, we have argued that protein-coding genes may be subject to strongly  
930 selected advantageous mutations, which were undetectable by analysis of the uSFS. If this  
931 were the case, adaptation in protein-coding genes could make a larger contribution to fitness  
932 change than regulatory sites.

933

### 934 **Limitations of the study**

935

936           There is a growing body of evidence suggesting that hard sweeps may not be the  
937 primary mode of adaptation in both *D. melanogaster* and humans. Firstly, soft sweeps, where  
938 multiple haplotypes reach fixation due to the presence of multiple *de novo* mutations or  
939 selection acted on standing variation, may be common. Garud *et al.* [64] developed a suite of  
940 haplotype-based statistics that can discriminate between soft and hard SSWs. The application  
941 of these statistics to North American and Zambian populations of *D. melanogaster* suggested  
942 that soft sweeps are the dominant mode of adaptation in that species, at least in recent  
943 evolutionary time [64, 65]. Furthermore, Schridder and Kern [66] recently reported that signatures  
944 of soft sweeps are more frequent than those of hard sweeps in humans. However, their method  
945 did not explicitly include the effects of partial sweeps and/or BGS. Under a model of stabilising  
946 selection acting on a polygenic trait, if the environment changes, adaptation to a new optimum

947 may cause small shifts in allele frequency at numerous loci without necessarily resulting in  
948 fixations [67, 68]. Genome-wide association study hits in humans exhibit evidence that such  
949 partial SSWs may be common [69]. These results all suggest that the landscape of adaptation  
950 may be more complex than the model of directional selection acting on a *de novo* mutation  
951 assumed in this study. For example, our simulations did not incorporate changing environments  
952 or stabilising selection, so we were unable to model adaptive scenarios other than hard sweeps.  
953

954 Further work should aim to understand the probabilities of the different types of sweeps.  
955 Different functional elements have different DFEs for harmful mutations. In particular, regulatory  
956 elements seem to experience more mildly selected deleterious mutations than coding  
957 sequences [18, 20] (Table 2). It has been argued that such differences in constraint between  
958 coding and non-coding elements may be due to a lower pleiotropic burden on regulatory  
959 sequences [61]. Differences in the DFE among different genomic elements is expected to affect  
960 genetic diversity within these elements. This, in turn, may affect the modes of sweeps that  
961 occur, since the relative probabilities of a hard or soft sweep depend on the level of standing  
962 genetic variation (reviewed in [70]).  
963

964 In our simulations, we treated  $N_e$  as constant through time, but this is likely to be an  
965 oversimplification. We analysed two different classes of putatively neutral sites, and inferred  
966 there has been a population size bottleneck followed by an expansion (Table S2). In our  
967 simulations, however, we showed that the inferred demographic history may largely be an  
968 artefact of selection at linked sites (Table S5). There is a strongly negative Tajima's  $D$  in  
969 genomic regions far from functional elements, which is not explained by selection (or at least the  
970 selection parameters we inferred) (Figure 4). This reduction is presumably caused by a  
971 demographic history or strong selection that was not included in our simulations. Less biased  
972 estimates of the demographic history of *M. m. castaneus* may be obtained from regions of the



973 genome experiencing high recombination rates, located far from functional elements. Finally,  
974 mouse populations may rapidly oscillate in size (e.g. seasonally [71]). If this were the case, so  
975 would the effective selection strength of new mutations (and thus the probabilities of SSWs)  
976 [72].

977

978 In house mice, crossing over events predominantly occur in narrow windows of the  
979 genome termed recombination hotspots [73]. The locations of recombination hotspots have  
980 evolved very rapidly between and within *M. musculus* sub-species [74]. Assuming a single suite  
981 of recombination hotspots in simulations may produce misleading results if hotspot locations  
982 evolve faster than the rate of neutral coalescence. Recombination hotspots are an important  
983 feature of the recombination landscape in mice and thus potential influence the patterns of  
984 diversity around functional elements, but the appropriate way to model them is unclear.

985

## 986 **Conclusions**

987

988 Using simulations, we have shown that estimates of the DFE obtained by analysis of the  
989 uSFS can explain the patterns of diversity around CNEs, but not around protein-coding exons.  
990 We also argue that mutations with moderately advantageous effects frequently occur at 0-fold  
991 and UTR sites, but that undetectable, strongly advantageous mutations may occur in both these  
992 classes of sites. Estimates of the strength and rate of advantageous mutations could be  
993 obtained by directly fitting a sweep model to the troughs in diversity around functional elements.  
994 We have shown that BGS makes a substantial contribution to these troughs, and using models  
995 that incorporate both BGS and sweeps [5, 43, 75] might allow us to make more robust  
996 estimates of selection parameters.

997

## 998 **Acknowledgements**

999

1000 We owe thanks to Brian Charlesworth for useful comments on the manuscript and to  
1001 Deborah Charlesworth, Dan Halligan and the evolutionary genetics lab group at the University  
1002 of Edinburgh for helpful discussions. Tom Booker is supported by a BBSRC EASTBIO  
1003 Studentship. This project has received funding from the European Research Council (ERC)  
1004 under the European Union's Horizon 2020 research and innovation program (grant agreement  
1005 No. 694212).

1006

1007 **References**

1008

- 1009 1. Begun DJ, Aquadro CF. Levels of naturally occurring DNA polymorphism correlate with  
1010 recombination rate in *Drosophila melanogaster*. *Nature*. 1992;356.
- 1011 2. Aguade M, Miyashita N, Langley CH. Reduced variation in the yello-achaete-schute  
1012 region in natural populations of *Drosophila melanogaster*. *Genetics*. 1989;122:607-15.
- 1013 3. Cutter AD, Payseur BA. Genomic signatures of selection at linked sites: unifying the  
1014 disparity among species. *Nature Reviews Genetics*. 2013;14(4):262-74.
- 1015 4. Corbett-Detig RB, Hartl DL, Sackton TB. Natural selection constrains neutral diversity  
1016 across a wide range of species. *PLoS Biology*. 2015;13(4):e1002112.
- 1017 5. Elyashiv E, Sattath S, Hu TT, Strutsovsky A, McVicker G, Andolfatto P, et al. A genomic  
1018 map of the effects of linked selection in *Drosophila*. *PLoS Genetics*. 2016;12(8):e1006130.
- 1019 6. McVicker G, Gordon D, Davis C, Green P. Widespread genomic signatures of natural  
1020 selection in hominid evolution. *PLoS Genetics*. 2009;5(5):e1000471.
- 1021 7. Comeron J. Background selection as a baseline for nucleotide variation across the  
1022 *Drosophila* genome. *PLoS Genetics*. 2014;10(6).

- 1023 8. Charlesworth B. The role of background selection in shaping patterns of molecular  
1024 evolution and variation: evidence from variability on the *Drosophila* X chromosome. *Genetics*.  
1025 2012;191(1):233-46.
- 1026 9. Maynard Smith J, Haigh J. The hitch-hiking effect of a favourable gene. *Genetical*  
1027 *Research*. 1974;23:23-5.
- 1028 10. Barton NH. Genetic hitchhiking. *Philosophical Transactions of the Royal Society of*  
1029 *London Series B, Biological Sciences*. 2000;355(1403):1553-62.
- 1030 11. Booker TR, Jackson BC, Keightley PD. Detecting positive selection in the genome. *BMC*  
1031 *Biol*. 2017;15(1):98.
- 1032 12. Charlesworth B. Background selection 20 years on: the Wilhelmine E. Key 2012  
1033 invitational lecture. *The Journal of heredity*. 2013;104(2):161-71.
- 1034 13. Charlesworth B, Morgan MT, Charlesworth D. The effect of deleterious mutations on  
1035 neutral molecular variation. *Genetics*. 1993;134:1289-303.
- 1036 14. Nordborg M, Charlesworth B, Charlesworth D. The effect of recombination on  
1037 background selection. *Genetical Research*. 1996;67:159-74.
- 1038 15. Hudson RR, Kaplan NL. Deleterious background selection with recombination. *Genetics*.  
1039 1995;141:1605-17.
- 1040 16. Stephan W. Genetic hitchhiking versus background selection: the controversy and its  
1041 implications. *Philosophical Transactions of the Royal Society of London Series B, Biological*  
1042 *Sciences*. 2010;365(1544):1245-53.
- 1043 17. Sattath S, Elyashiv E, Kolodny O, Rinott Y, Sella G. Pervasive adaptive protein evolution  
1044 apparent in diversity patterns around amino acid substitutions in *Drosophila simulans*. *PLoS*  
1045 *Genetics*. 2011;7(2):e1001302.
- 1046 18. Williamson RJ, Josephs EB, Platts AE, Hazzouri KM, Haudry A, Blanchette M, et al.  
1047 Evidence for widespread positive and negative selection in coding and conserved noncoding  
1048 regions of *Capsella grandiflora*. *PLoS Genetics*. 2014;10(9):e1004622.

- 1049 19. Hernandez RD, Kelly JL, Elyashiv E, Melton SC, Auton A, McVean G, et al. Classic  
1050 selective sweeps were rare in recent human evolution. *Science*. 2011;331:920-4.
- 1051 20. Halligan DL, Kousathanas A, Ness RW, Harr B, Eory L, Keane TM, et al. Contributions  
1052 of protein-coding and regulatory change to adaptive molecular evolution in murid rodents. *PLoS*  
1053 *Genetics*. 2013;9(12):e1003995.
- 1054 21. Beissinger TM, Wang L, Crosby K, Durvasula A, Hufford MB, Ross-Ibarra J. Recent  
1055 demography drives changes in linked selection across the maize genome. *Nature Plants*.  
1056 2016;2(7):16084.
- 1057 22. Enard D, Messer PW, Petrov DA. Genome-wide signals of positive selection in human  
1058 evolution. *Genome Research*. 2014;24(6):885-95.
- 1059 23. Boyko AR, Williamson SH, Indap AR, Degenhardt JD, Hernandez RD, Lohmueller KE, et  
1060 al. Assessing the evolutionary impact of amino acid mutations in the human genome. *PLoS*  
1061 *Genetics*. 2008;4(5):e1000083.
- 1062 24. Keightley PD, Eyre-Walker A. Joint inference of the distribution of fitness effects of  
1063 deleterious mutations and population demography based on nucleotide polymorphism  
1064 frequencies. *Genetics*. 2007;177(4):2251-61.
- 1065 25. Schneider A, Charlesworth B, Eyre-Walker A, Keightley PD. A method for inferring the  
1066 rate of occurrence and fitness effects of advantageous mutations. *Genetics*. 2011;189(4):1427-  
1067 37.
- 1068 26. Tataru P, Mollion M, Glemin S, Bataillon T. Inference of distribution of fitness effects and  
1069 proportion of adaptive substitutions from polymorphism data. *Genetics*. 2017;207(3):1103-19.
- 1070 27. Halligan DL, Oliver F, Eyre-Walker A, Harr B, Keightley PD. Evidence for pervasive  
1071 adaptive protein evolution in wild mice. *PLoS Genetics*. 2010;6(1):e1000825.
- 1072 28. Baines JF, Harr B. Reduced X-linked diversity in derived populations of house mice.  
1073 *Genetics*. 2007;175(4):1911-21.

- 1074 29. Lowe CB, Kellis M, Siepel A, Raney BJ, Clamp M, Salama SR, et al. Three periods of  
1075 regulatory innovation during vertebrate evolution. *Science*. 2011;333(6045):pp. 1019-24.
- 1076 30. Charlesworth D. Balancing selection and its effects on sequences in nearby genome  
1077 regions. *PLoS Genetics*. 2006;2(4):e64.
- 1078 31. Keightley PD, Campos JL, Booker TR, Charlesworth B. Inferring the frequency spectrum  
1079 of derived variants to quantify adaptive molecular evolution in protein-coding genes of  
1080 *Drosophila melanogaster*. *Genetics*. 2016;203(2):975-84.
- 1081 32. Kim Y. Allele frequency distribution under recurrent selective sweeps. *Genetics*.  
1082 2006;172(3):1967-78.
- 1083 33. Braverman JM, Hudson RR, Kaplan NL, Langley CH, Stephan W. The hitchhiking effect  
1084 on the site frequency spectrum of DNA polymorphisms. *Genetics*. 1995;140:783-96.
- 1085 34. dos Reis M, Wernisch L. Estimating translational selection in eukaryotic genomes.  
1086 *Molecular Biology and Evolution*. 2009;26(2):451-61.
- 1087 35. Eyre-Walker A, Woolfit M, Phelps T. The distribution of fitness effects of new deleterious  
1088 amino acid mutations in humans. *Genetics*. 2006;173(2):891-900.
- 1089 36. Glemin S, Arndt PF, Messer PW, Petrov D, Galtier N, Duret L. Quantification of GC-  
1090 biased gene conversion in the human genome. *Genome Research*. 2015;25(8):1215-28.
- 1091 37. Eyre-Walker A, Keightley PD. The distribution of fitness effects of new mutations. *Nature*  
1092 *Reviews Genetics*. 2007;8(8):610-8.
- 1093 38. Kousathanas A, Keightley PD. A comparison of models to infer the distribution of fitness  
1094 effects of new mutations. *Genetics*. 2013;193(4):1197-208.
- 1095 39. Messer PW. SLiM: simulating evolution with selection and linkage. *Genetics*.  
1096 2013;194(4):1037-9.
- 1097 40. Wiehe T, Stephan W. Analysis of a genetic hitchhiking model, and its application to DNA  
1098 polymorphism data from *Drosophila melanogaster*. *Molecular Biology and Evolution*.  
1099 1993;10(4):842-54.

- 1100 41. Coop G, Ralph P. Patterns of neutral diversity under general models of selective  
1101 sweeps. *Genetics*. 2012;192(1):205-24.
- 1102 42. Geraldès A, Basset P, Smith KL, Nachman MW. Higher differentiation among  
1103 subspecies of the house mouse (*Mus musculus*) in genomic regions with low recombination.  
1104 *Molecular Ecology*. 2011;20(22):4722-36.
- 1105 43. Campos JL, Zhao L, Charlesworth B. Estimating the parameters of background selection  
1106 and selective sweeps in *Drosophila* in the presence of gene conversion. *Proc Natl Acad Sci*.  
1107 2017;Early Online.
- 1108 44. Booker TR, Ness RW, Keightley PD. The recombination landscape in wild house mice  
1109 inferred using population genomic data. *Genetics*. 2017;207(1):297-309.
- 1110 45. Messer PW, Petrov DA. Frequent adaptation and the McDonald-Kreitman test. *Proc Natl*  
1111 *Acad Sci*. 2013;110(21):8615-20.
- 1112 46. Schrider RD, Shanku GA, Kern DA. Effects of linked selective sweeps on demographic  
1113 inference and model selection. *Genetics*. 2016(Early Online Access).
- 1114 47. Ewing GB, Jensen JD. The consequences of not accounting for background selection in  
1115 demographic inference. *Molecular Ecology*. 2016;25(1):135-41.
- 1116 48. Eyre-Walker A, Keightley PD. Estimating the rate of adaptive molecular evolution in the  
1117 presence of slightly deleterious mutations and population size change. *Molecular Biology and*  
1118 *Evolution*. 2009;26(9):2097-108.
- 1119 49. Halligan DL, Oliver F, Guthrie J, Stemshorn KC, Harr B, Keightley PD. Positive and  
1120 negative selection in murine ultraconserved noncoding elements. *Molecular Biology and*  
1121 *Evolution*. 2011;28(9):2651-60.
- 1122 50. Kousathanas A, Halligan DL, Keightley PD. Faster-X adaptive protein evolution in house  
1123 mice. *Genetics*. 2014;196(4):1131-43.

- 1124 51. Kousathanas A, Oliver F, Halligan DL, Keightley PD. Positive and negative selection on  
1125 noncoding DNA close to protein-coding genes in wild house mice. *Molecular Biology and*  
1126 *Evolution*. 2011;28(3):1183-91.
- 1127 52. Charlesworth D, Charlesworth B, Morgan MT. The pattern of neutral molecular variation  
1128 under the background selection model. *Genetics*. 1995;141:1619-32.
- 1129 53. Tajima F. Statistical method for testing the neutral mutation hypothesis by  
1130 polymorphism. *Genetics*. 1989;123:585-95.
- 1131 54. McDonald MJ, Rice DP, Desai MM. Sex speeds adaptation by altering the dynamics of  
1132 molecular evolution. *Nature*. 2016;531(7593):233-6.
- 1133 55. Bank C, Hietpas RT, Wong A, Bolon DN, Jensen JD. A Bayesian MCMC approach to  
1134 assess the complete distribution of fitness effects of new mutations: uncovering the potential for  
1135 adaptive walks in challenging environments. *Genetics*. 2014;196(3):841-52.
- 1136 56. Kimura M, Ohta T. The average number of generations until fixation of a mutant gene in  
1137 a finite population. *Genetics*. 1969;61(3):763-71.
- 1138 57. Fisher RA. The distribution of gene ratios for rare mutations. *Proc R Soc of Edinb*.  
1139 1930;50:205-20.
- 1140 58. Sella G, Petrov DA, Przeworski M, Andolfatto P. Pervasive natural selection in the  
1141 *Drosophila* genome? *PLoS Genetics*. 2009;19(6).
- 1142 59. Teschke M, Mukabayire O, Wiehe T, Tautz D. Identification of selective sweeps in  
1143 closely related populations of the house mouse based on microsatellite scans. *Genetics*.  
1144 2008;180:1537-45.
- 1145 60. King M-C, Wilson AC. Evolution at two levels in humans and chimpanzees. *Science*.  
1146 1975;188(4184):107-16.
- 1147 61. Carroll SB. Evolution at two levels: on genes and form. *PLoS Biology*. 2005;3(7):e245.
- 1148 62. Franchini LF, Pollard KS. Human evolution: the non-coding revolution. *BMC Biology*.  
1149 2017;15(1).

- 1150 63. Falconer DS, Mackay FC. Introduction to Quantitative Genetics. 4th ed. Harlow:  
1151 Longman; 1996. 464 p.
- 1152 64. Garud NR, Messer PW, Buzbas EO, Petrov DA. Recent selective sweeps in North  
1153 American *Drosophila melanogaster* show signatures of soft sweeps. PLoS Genetics.  
1154 2015;11(2):e1005004.
- 1155 65. Garud NR, Petrov DA. Elevated linkage disequilibrium and signatures of soft sweeps are  
1156 common in *Drosophila melanogaster*. Genetics. 2016;203(2):863-80.
- 1157 66. Schrider DR, Kern AD. Soft sweeps are the dominant mode of adaptation in the human  
1158 genome. Molecular Biology and Evolution. 2017.
- 1159 67. Pritchard JK, Pickrell JK, Coop G. The genetics of human adaptation: hard sweeps, soft  
1160 sweeps, and polygenic adaptation. Current biology : CB. 2010;20(4):R208-15.
- 1161 68. Barton NH, Keightley PD. Understanding quantitative genetic variation. Nature Reviews  
1162 Genetics. 2002;3(1):11-21.
- 1163 69. Field Y, Boyle EA, Telis N, Gao Z, Gaulton KJ, Golan D, et al. Detection of human  
1164 adaptation during the past 2000 years. Science. 2016;354(6313):760-4.
- 1165 70. Hermisson J, Pennings PS. Soft sweeps and beyond: understanding the patterns and  
1166 probabilities of selection footprints under rapid adaptation. Methods in Ecology and Evolution.  
1167 2017;8(6):700-16.
- 1168 71. Pennycuik PR, Johnston PG, Westwood NH, Reisner AH. Variation in number in a  
1169 house mouse population housed in a large outdoor enclosure. Journal of Animal Ecology.  
1170 1986;55(1):371-91.
- 1171 72. Otto SP, Whitlock MC. The probability of fixation in populations of changing size.  
1172 Genetics. 1997;146(723-733).
- 1173 73. Brick K, Smagulova F, Khil P, Camerini-Otero RD, Petukhova GV. Genetic  
1174 recombination is directed away from functional genomic elements in mice. Nature.  
1175 2012;485(7400):642-5.



1176 74. Smagulova F, Brick K, Yongmei P, Camerini-Otero RD, Petukhova GV. The evolutionary  
1177 turnover of recombination hotspots contributes to speciation in mice. *Genes & Development*.  
1178 2016;30:277-80.

1179 75. Kim Y, Stephan W. Joint effects of genetic hitchhiking and background selection on  
1180 neutral variation. *Genetics*. 2000;155:1415-27.

1181

1182

1183

1184

1185

1186

1187

1188

1189

1190

1191

1192

1193

1194

1195

1196

1197

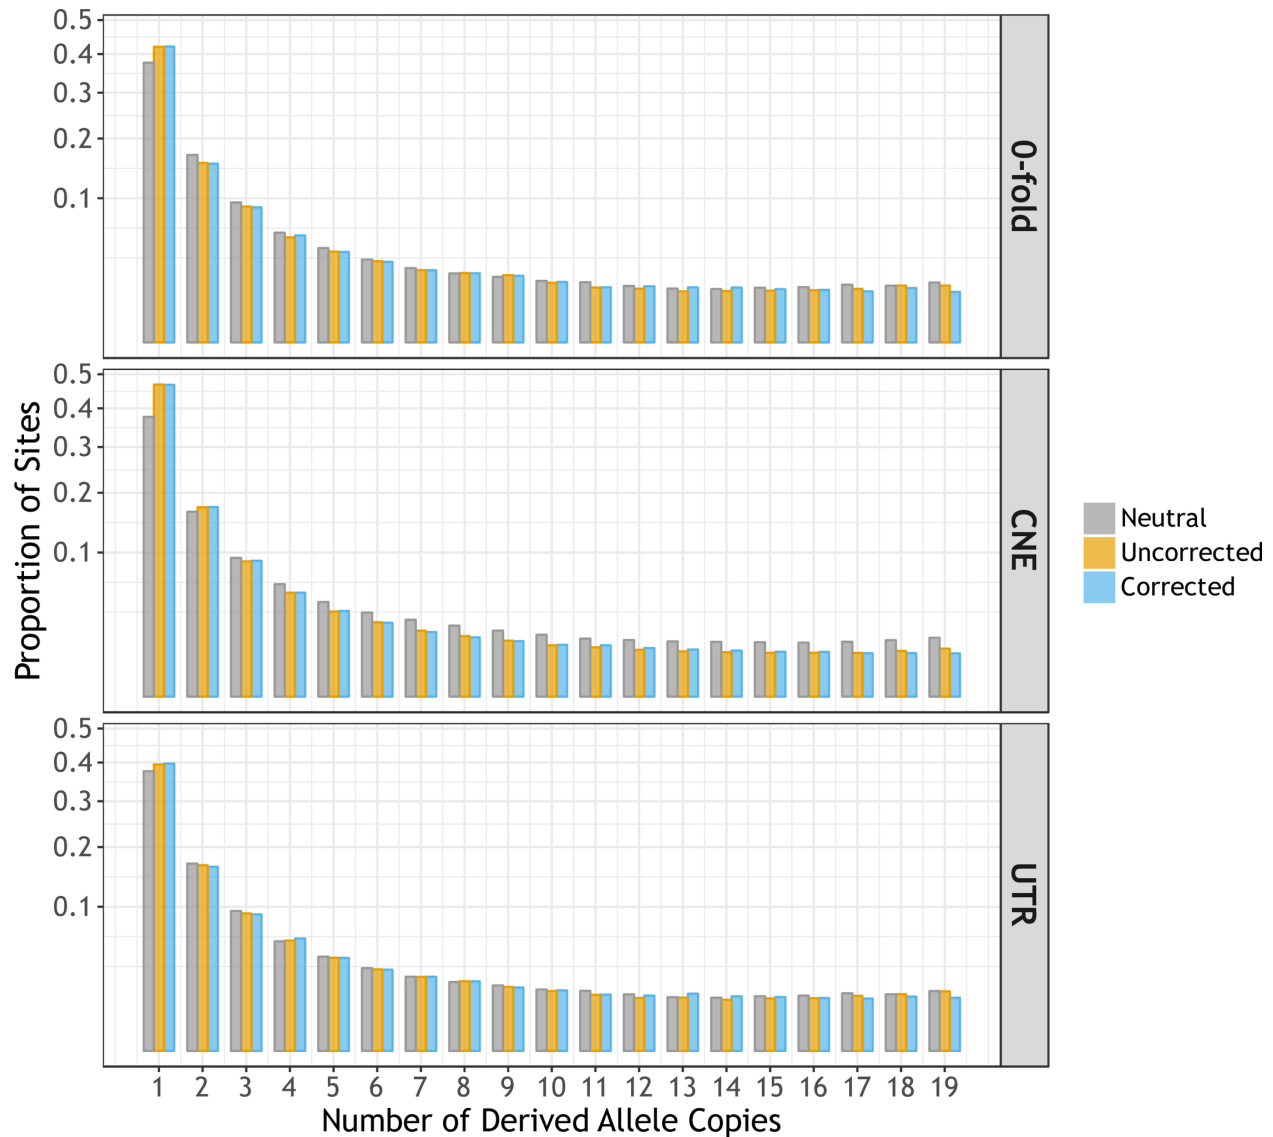

1198

1199 **Figure 1 The uSFS for three classes of functional sites (yellow and blue bars) compared**

1200 **to a putatively neutral comparator (grey bars).** The neutral comparator for 0-fold sites and

1201 UTRs was 4-fold degenerate synonymous sites in both cases. For CNEs, the neutral

1202 comparator was CNE-flanking sequence. The expected uSFS under a demographic model fitted

1203 to a neutral comparator was used to correct the uSFS for the corresponding selected sites (see

1204 *Methods*).

1205

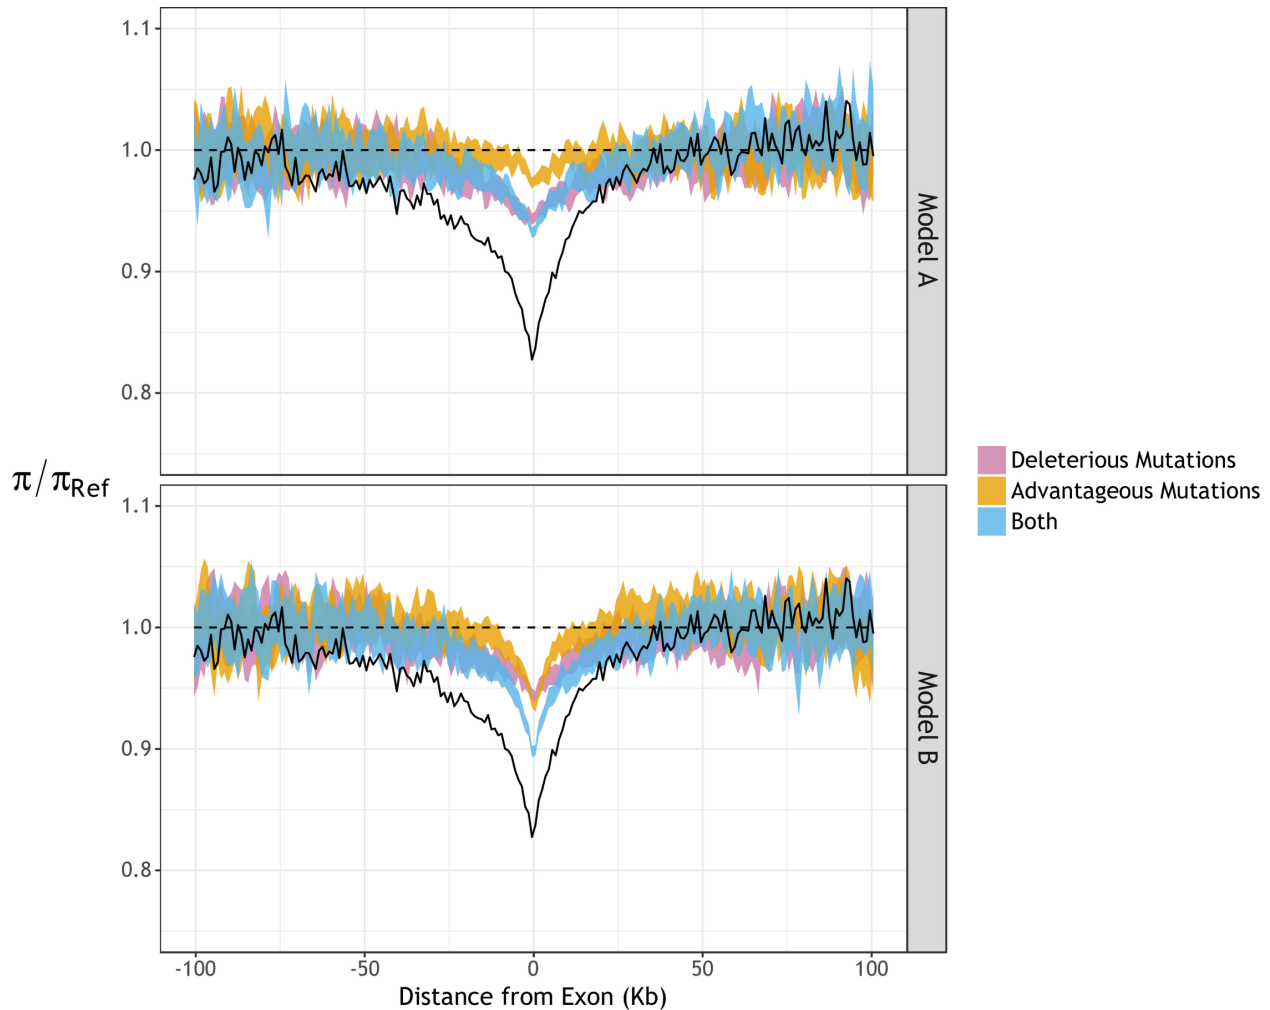

1206  
1207 **Figure 2 Estimates of scaled diversity ( $\pi/\pi_{Ref}$ ) around protein-coding exons (black lines)**

1208 **in *M. m. castaneus* compared to results from simulations (colored ribbons).** The panels  
1209 show diversity observed in simulated populations assuming DFE estimates obtained by analysis  
1210 of the full uSFS (Model A) or when sites fixed for the derived allele do not influence selection  
1211 parameters (Model B). Nucleotide diversity ( $\pi$ ) is scaled by the mean diversity at distances  
1212 more than 75 Kbp from exons ( $\pi_{Ref}$ ). Colored ribbons represent 95% confidence intervals  
1213 obtained from 1,000 bootstrap samples.

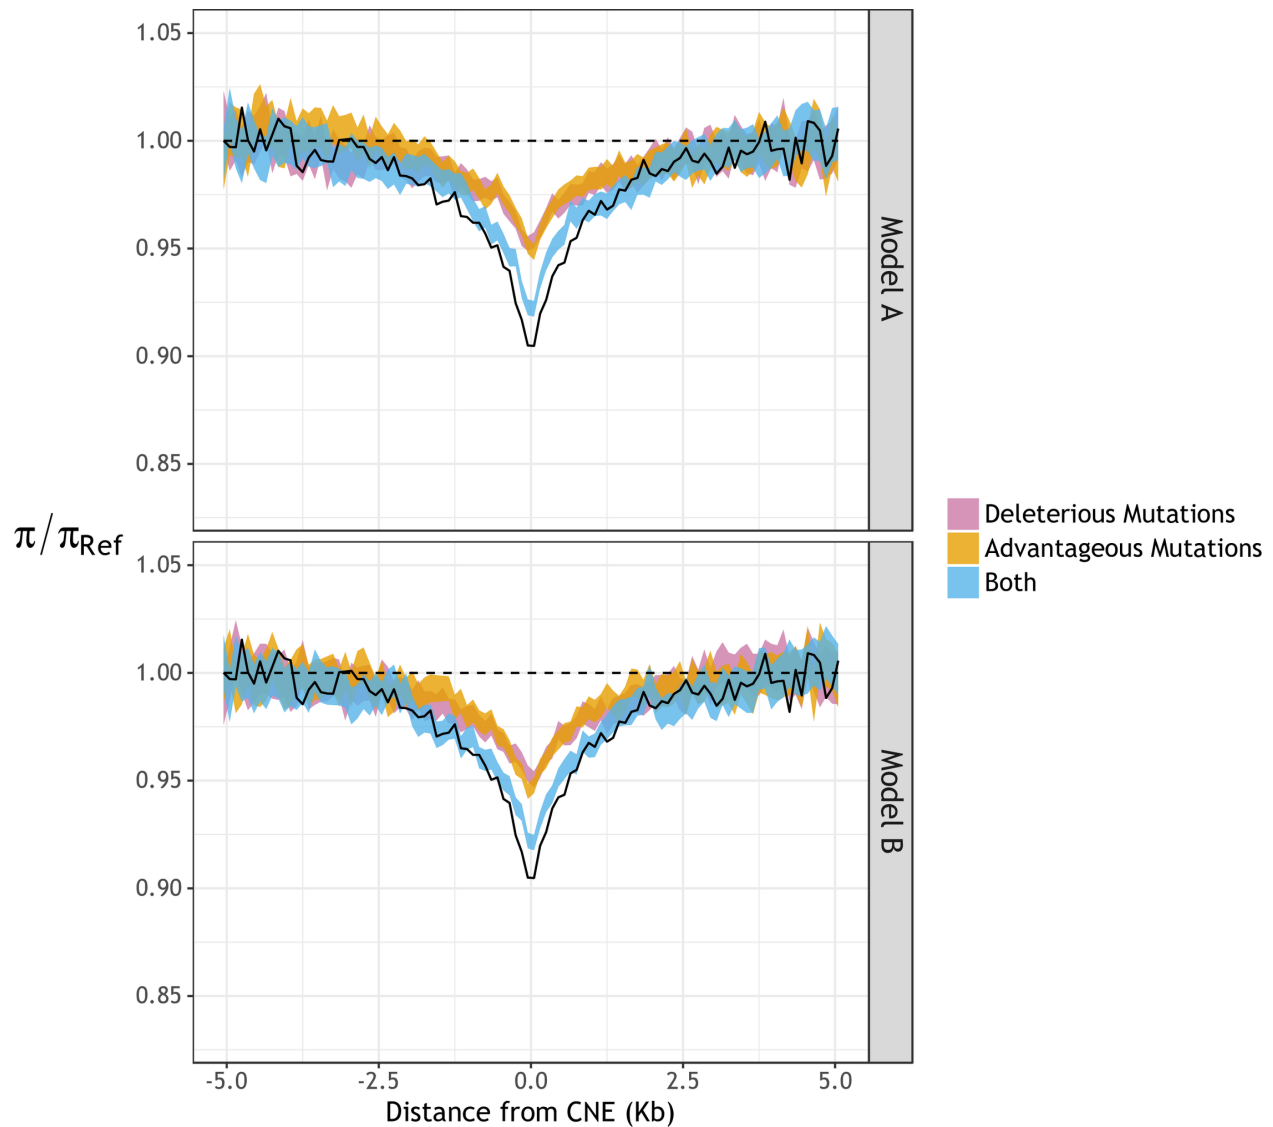

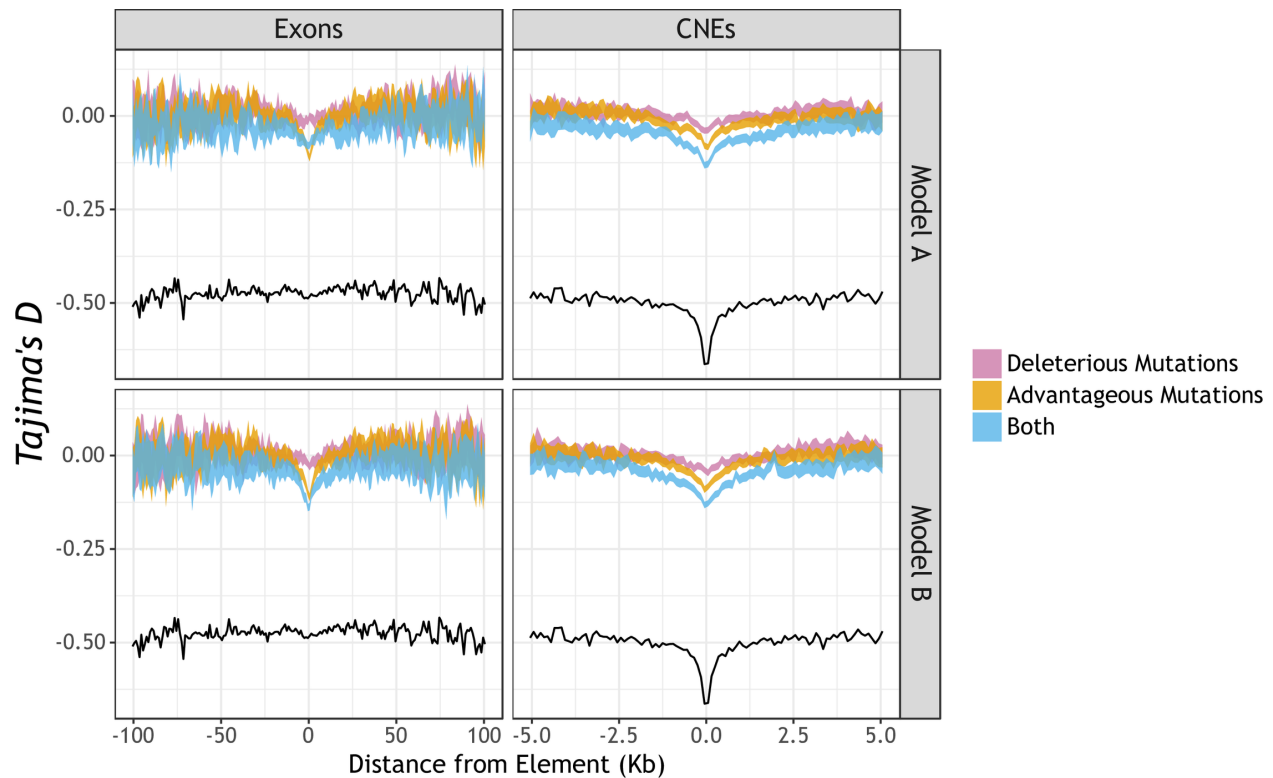

1223

1224 **Figure 4 Tajima's D around protein-coding exons and CNEs in *M. m. castaneus* compared**

1225 **to simulated data.** The black lines show Tajima's D computed from the *M. m. castaneus*

1226 genome sequence data around protein-coding exons or CNEs. The colored ribbons show the

1227 95% bootstrap intervals from simulated data assuming the DFEs estimated under either Model

1228 A (i.e. analyzing the full uSFS) or Model B (i.e. fixed derived sites do not contribute to the

1229 likelihood for selection parameters).

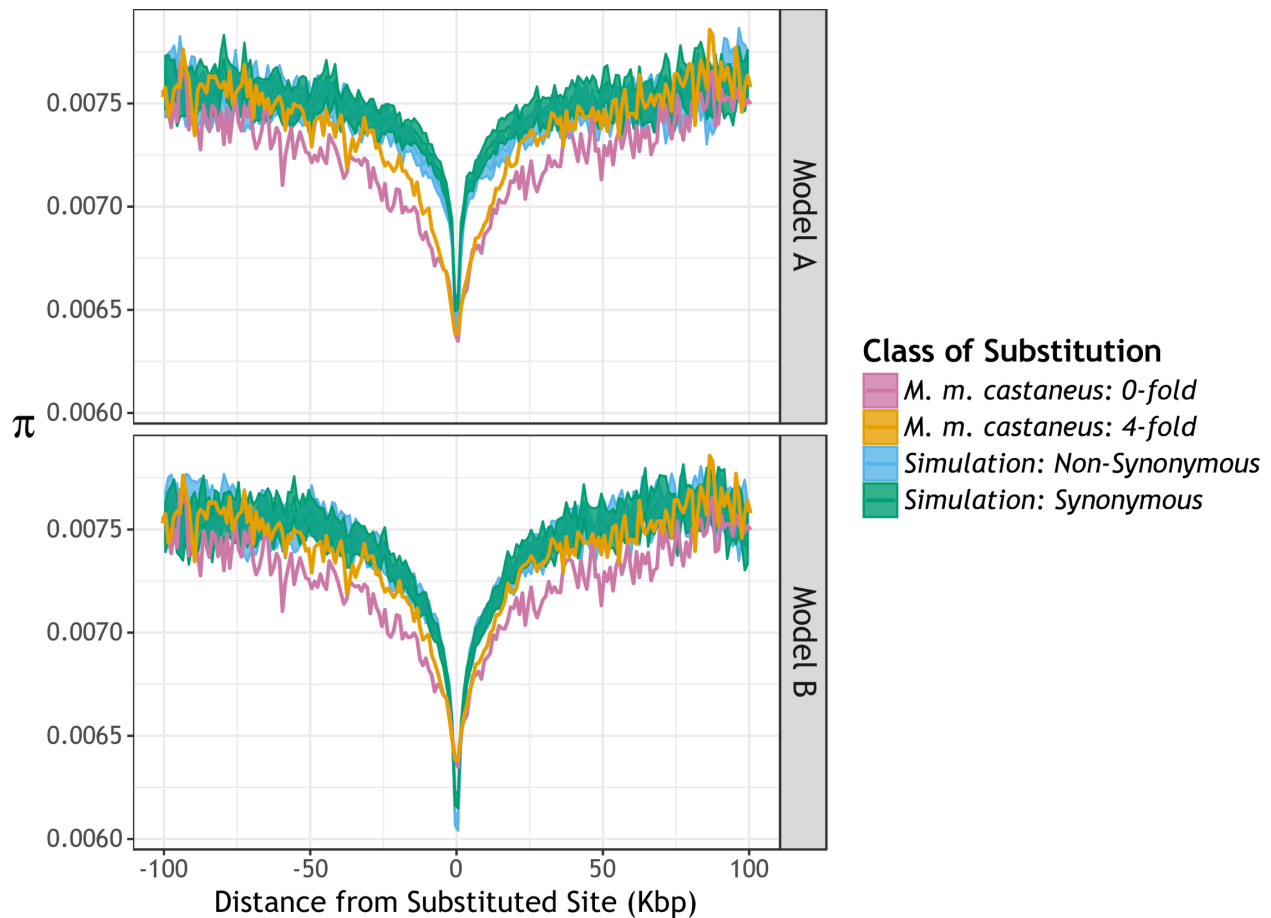

1242 **Table S1.** Comparison of the fit of demographic models based on the analysis of 4-fold sites  
1243 and CNE-flanks in *M. m. castaneus*.

1244

|                  | <b>Epochs</b> | <b><math>\Delta \ln L</math></b> | <b><math>\chi^2</math></b> | <b># Estimated Parameters</b> |
|------------------|---------------|----------------------------------|----------------------------|-------------------------------|
| <i>4-fold</i>    | 1             | 1,620                            | 22,500                     | 2                             |
|                  | 2             | 159                              | 2,930                      | 4                             |
|                  | 3             | 0.0                              | 553                        | 6                             |
| <i>CNE-flank</i> | 1             | 19,100                           | 53,500                     | 2                             |
|                  | 2             | 1,350                            | 5,070                      | 4                             |
|                  | 3             | 0.0                              | 975                        | 6                             |

1245

1246

1247

1248

1249

1250

1251

1252

1253

1254

1255

1256

1257

1258

1259

1260

1261

1262 **Table S2.** Parameters of the best-fitting demographic model estimated from the analysis of 4-  
1263 fold and CNE-flanking sites.

1264  
1265

|           | <b>4-fold</b> | <b>CNE-flank</b> |
|-----------|---------------|------------------|
| $N_2/N_1$ | 0.40          | 0.07             |
| $t_2/N_1$ | 0.44          | 0.17             |
| $N_3/N_1$ | 0.40          | 1.00             |
| $t_3/N_1$ | 1.10          | 0.63             |

1266  
1267  
1268  
1269  
1270  
1271  
1272  
1273  
1274  
1275  
1276  
1277  
1278  
1279  
1280  
1281  
1282



1283 **Table S3.** Likelihood differences between models of the deleterious DFE (dDFE) fitted with or  
 1284 without a single class of adaptive mutations.

1285

| Site Type     | dDFE Model | $\Delta \ln L$ |                           |
|---------------|------------|----------------|---------------------------|
|               |            | dDFE           | dDFE + Adaptive Mutations |
| <i>0-fold</i> | 1-Class    | 49,300         | 4.18                      |
|               | 2-Class    | 129            | <b>0.00</b>               |
|               | 3-Class    | 129            | 0.00                      |
|               | Gamma      | 247            | 4.18                      |
| <i>CNE</i>    | 1-Class    | 51,000         | 245                       |
|               | 2-Class    | 1,660          | 3.41                      |
|               | 3-Class    | 1,480          | <b>0.00</b>               |
|               | Gamma      | 2,310          | 19.3                      |
| <i>UTR</i>    | 1-Class    | 6,170          | 32.7                      |
|               | 2-Class    | 335            | <b>0.00</b>               |
|               | 3-Class    | 335            | 0.00                      |
|               | Gamma      | 970            | 13.5                      |

1286

1287

1288

1289

1290

1291

1292

1293

1294

1295

1296

1297

1298

1299

1300 **Table S4.** Parameter estimates for the scaled effect and frequency of advantageous mutations  
 1301 in three classes sites in *Mus musculus castaneus* when models incorporated either one class of  
 1302 advantageous mutations, or two.

1303

| Number of<br>Advantageous<br>Mutation<br>Classes                                            | 0-fold |        | UTR    |        | CNE    |        |
|---------------------------------------------------------------------------------------------|--------|--------|--------|--------|--------|--------|
|                                                                                             | 1      | 2      | 1      | 2      | 1      | 2      |
| <b>Model A: Full uSFS</b>                                                                   |        |        |        |        |        |        |
| $N_e s_a (1)$                                                                               | 7.27   | 7.27   | 5.32   | 5.32   | 9.17   | 9.17   |
| $p_a (1)$                                                                                   | 0.003  | 0.003  | 0.0133 | 0.0133 | 0.0098 | 0.0098 |
| $N_e s_a (2)$                                                                               | -      | 0.000  | -      | 0.000  | -      | 0.000  |
| $p_a (2)$                                                                                   | -      | 0.000  | -      | 0.000  | -      | 0.000  |
| $\Delta \ln L$                                                                              | -      | 0.000  | -      | 0.005  | -      | 0.000  |
| <b>Model B: Sites fixed for the derived allele do not contribute to parameter estimates</b> |        |        |        |        |        |        |
| $N_e s_a (1)$                                                                               | 8.30   | 8.30   | 6.96   | 6.96   | 8.60   | 8.60   |
| $p_a (1)$                                                                                   | 0.010  | 0.010  | 0.0294 | 0.0294 | 0.008  | 0.008  |
| $N_e s_a (2)$                                                                               | -      | 0.0925 | -      | 33.6   | -      | 0.240  |
| $p_a (2)$                                                                                   | -      | 0.000  | -      | 0.000  | -      | 0.000  |
| $\Delta \ln L$                                                                              | -      | 0.000  | -      | 0.000  | -      | 0.002  |

1304

1305

1306

1307

1308

1309

1310

1311

1312

1313

1314

1315 **Table S5.** Parameters of the selection model (2-Class dDFE + adaptation) when estimated from  
 1316 simulated data.

1317

|                           |                                                | <b>Model A</b>  |           | <b>Model B</b>  |           |
|---------------------------|------------------------------------------------|-----------------|-----------|-----------------|-----------|
|                           |                                                | Simulated Value | Estimated | Simulated Value | Estimated |
|                           | <b><math>N_e s</math> (0)</b>                  | -0.045          | -0.70     | -0.171          | -0.40     |
|                           | <b><math>p</math> (0)</b>                      | 0.191           | 0.145     | 0.184           | 0.181     |
|                           | <b><math>N_e s</math> (1)</b>                  | -104            | -92.3     | -100            | -77.3     |
|                           | <b><math>p</math> (1)</b>                      | 0.806           | 0.784     | 0.806           | 0.799     |
|                           | <b><math>N_e s</math> (a)</b>                  | 7.27            | 0.950     | 8.30            | 4.91      |
|                           | <b><math>p</math> (a)</b>                      | 0.00300         | 0.0710    | 0.0100          | 0.0200    |
|                           | <b><i>Estimated in<br/>M. m. castaneus</i></b> |                 |           |                 |           |
| <b><math>N2/N1</math></b> | 0.40                                           | -               | 0.20      | -               | 0.12      |
| <b><math>N3/N1</math></b> | 1.4                                            | -               | 1.0       | -               | 0.9       |
| <b><math>t2/N2</math></b> | 0.31                                           | -               | 0.46      | -               | 1.2       |
| <b><math>t3/N3</math></b> | 0.79                                           | -               | 1.4       | -               | 1.3       |

1318

1319

1320

1321

1322

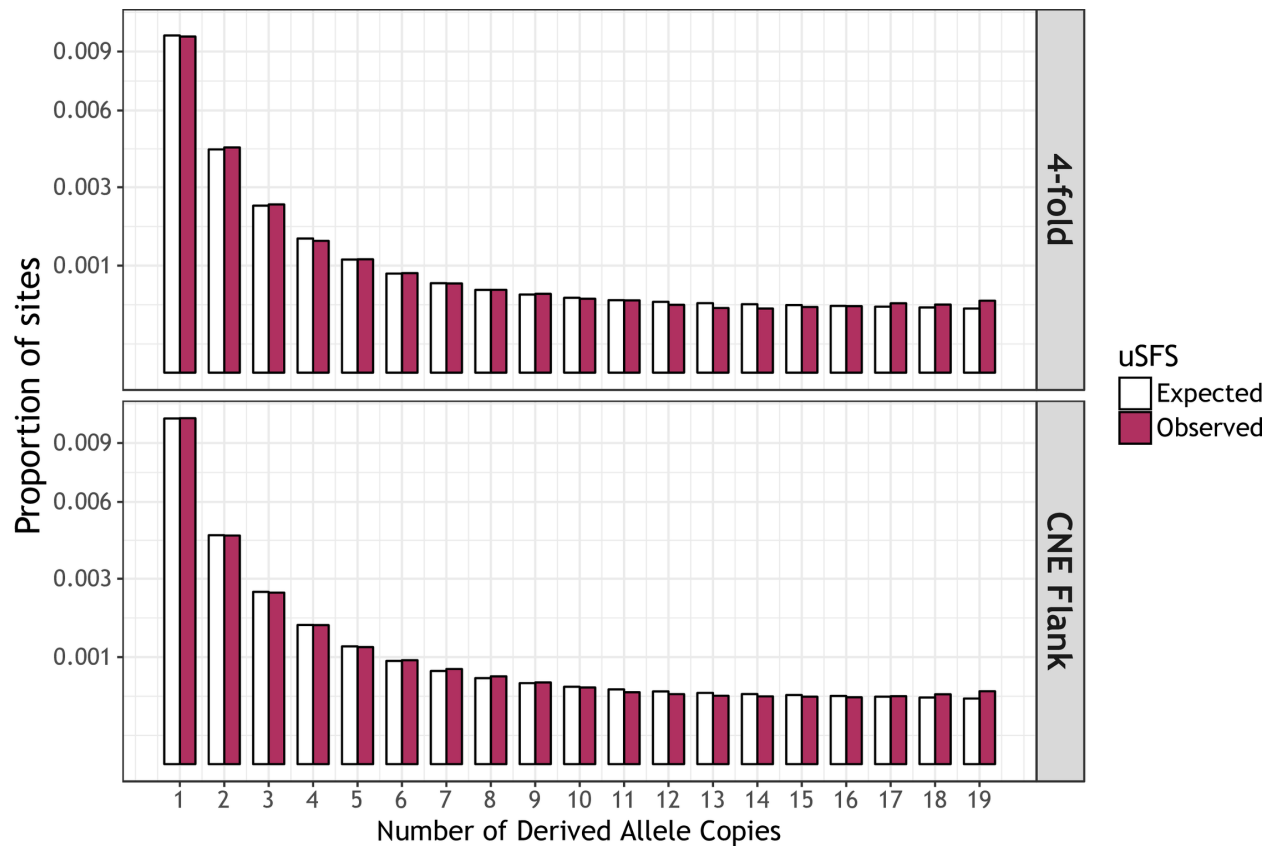

1323

1324 **Figure S1.** A comparison of the uSFS expected and observed under the best-fitting

1325 demographic models for two classes of putatively neutral sites, 4-fold degenerate synonymous

1326 sites and CNE-flanking sequences.

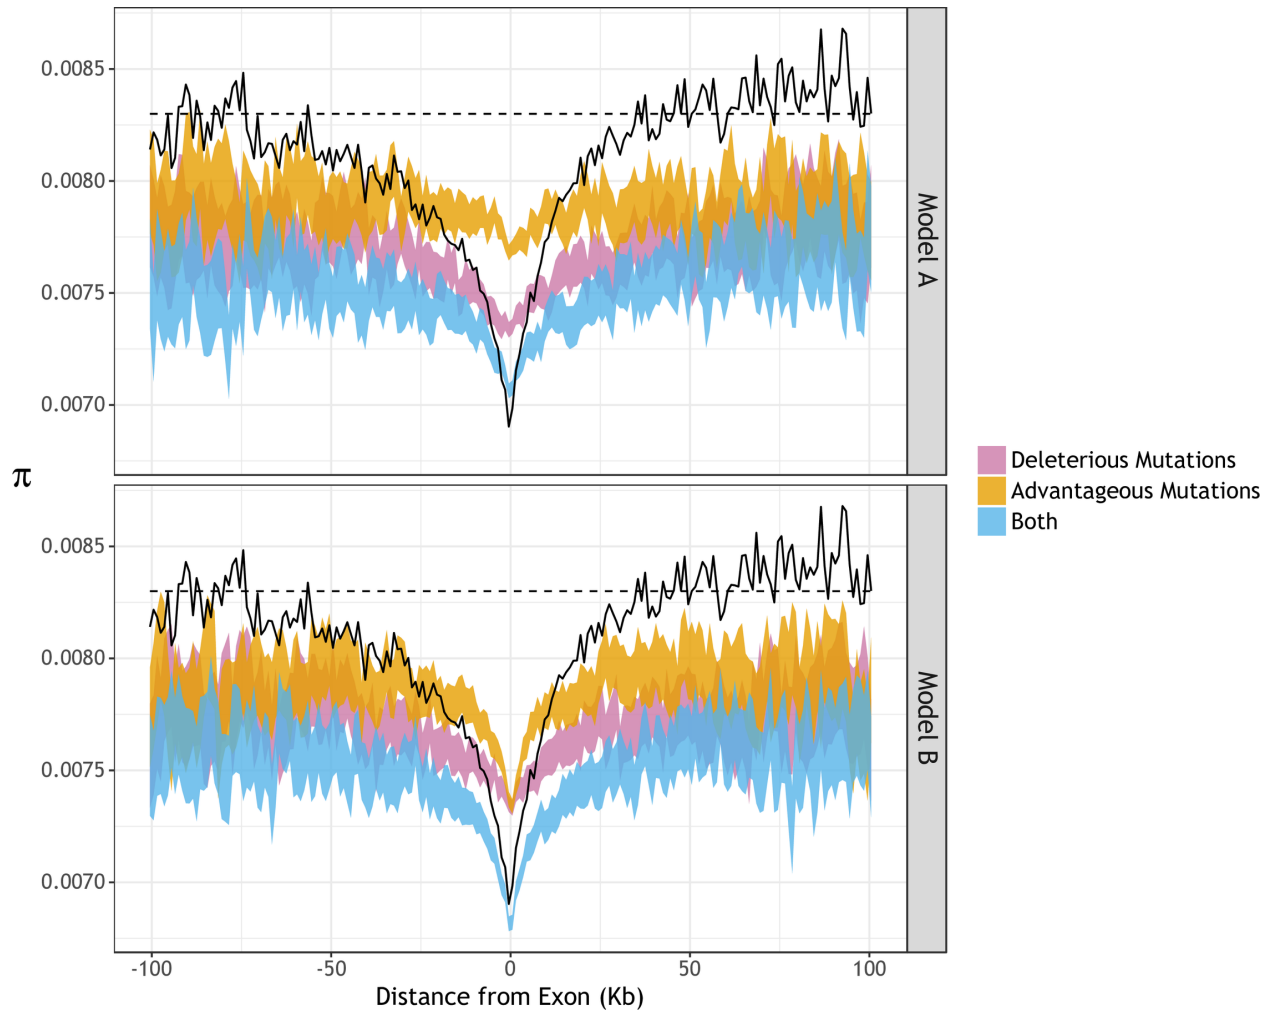

1327

1328 **Figure S2.** Estimates of unscaled  $\pi$  around protein-coding exons in *M. m. castaneus* (black

1329 line) compared to the values observed in simulated populations (coloured ribbons).

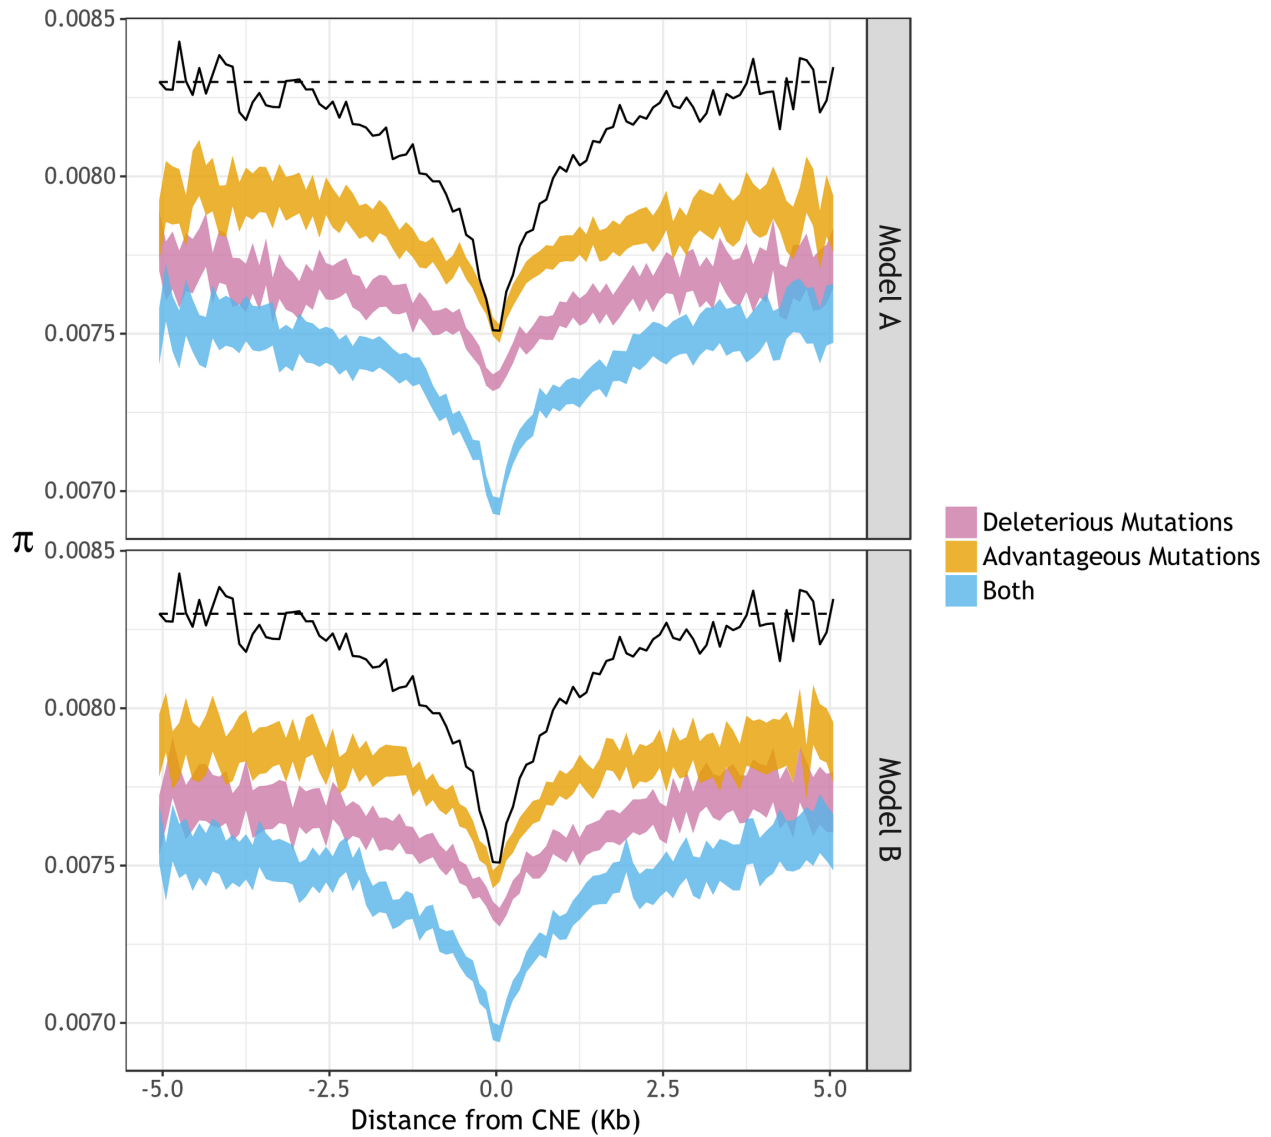

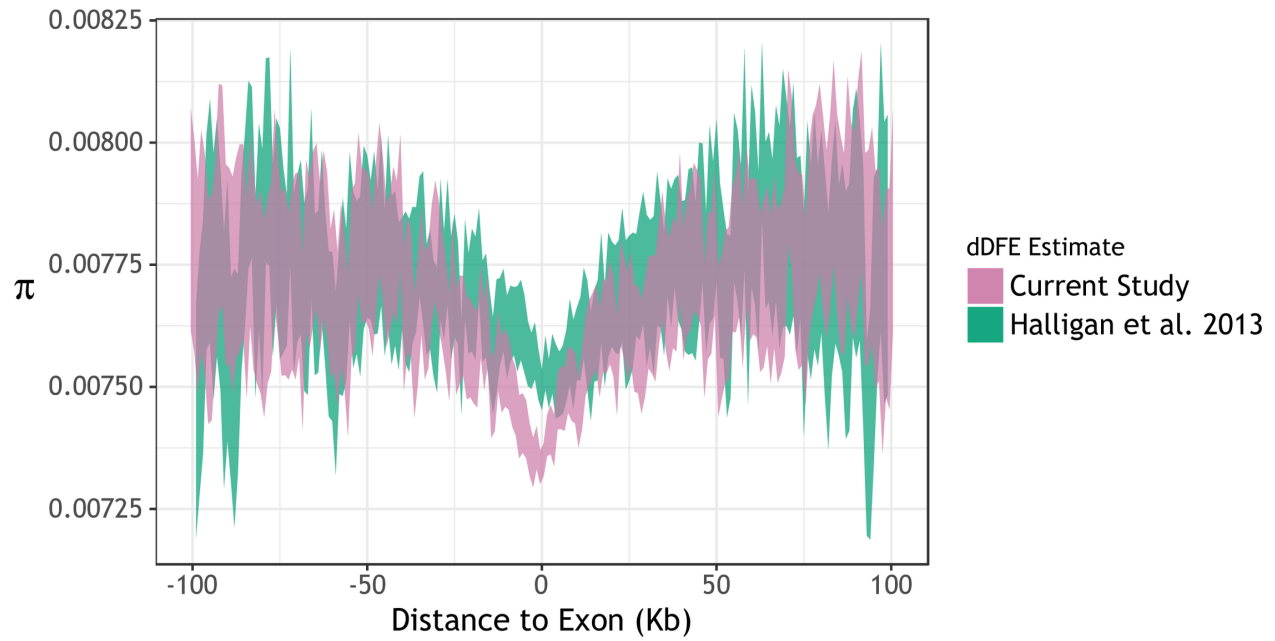

1333

1334 **Figure S4.** Comparison of nucleotide diversity ( $\pi$ ) around protein-coding exons in simulated  
1335 populations under either the discrete-class dDFE estimated in the current study or the gamma  
1336 dDFE estimated by Halligan *et al.* [20].

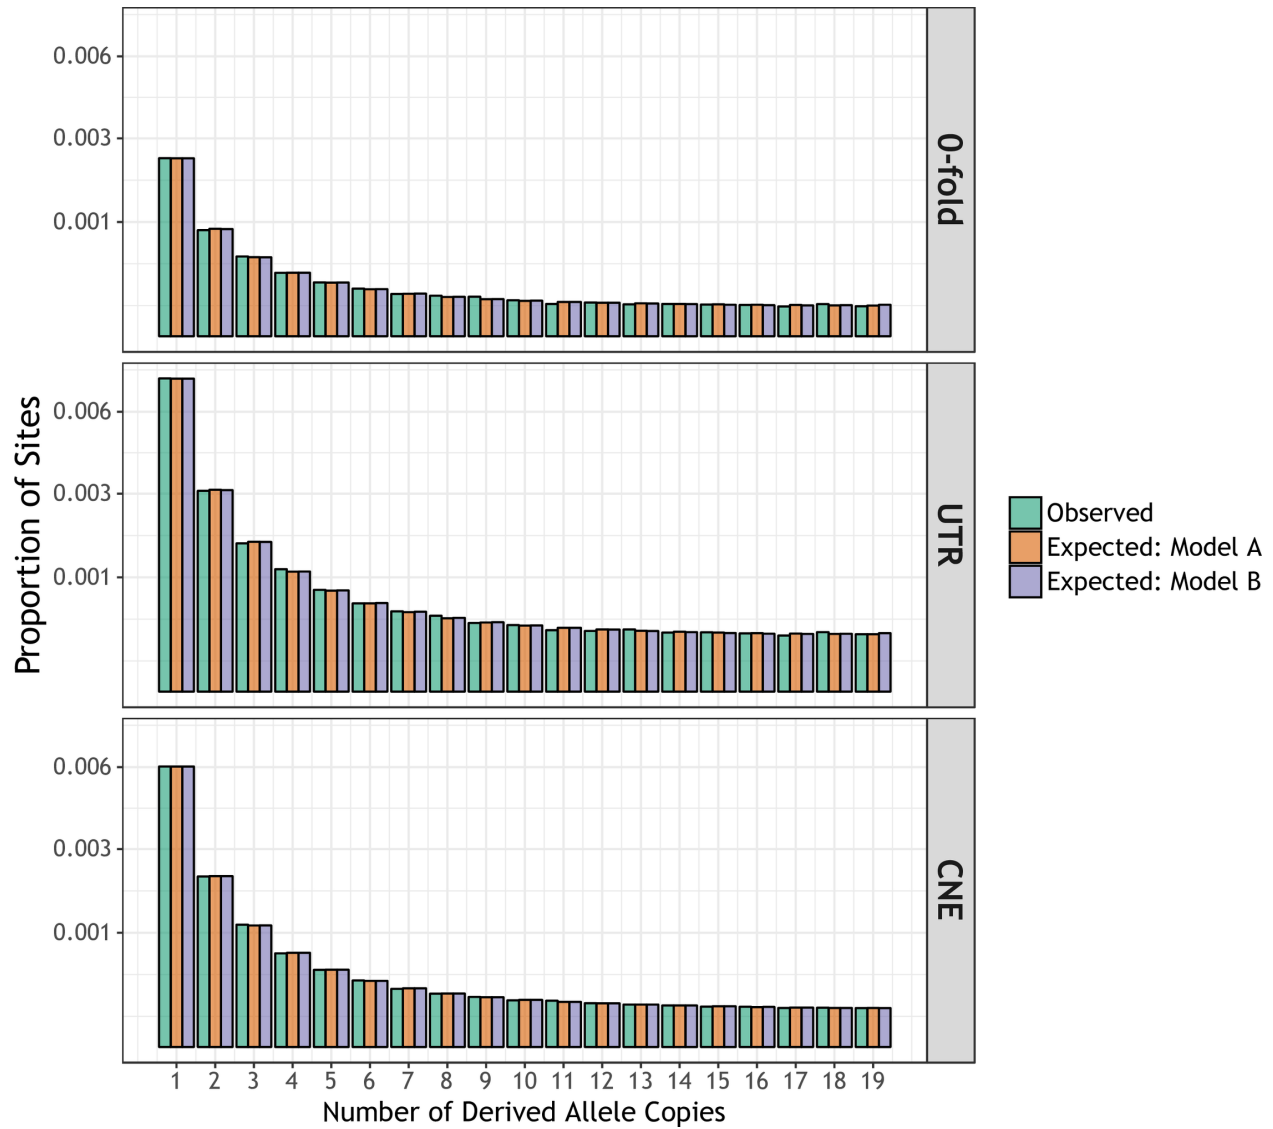

1337

1338 **Figure S5.** A comparison of the uSFS expected and observed under the best-fitting selection

1339 models for three classes of functional sites.

1340
